# Supplementary material for: Medfly Population Suppression through Augmentative Release of an Introduced Parasitoid in an Irrigated Multi-Fruit Orchard of Central–Western Argentina
Source: MDPI journal article supplement (doi:10.3390/insects14040387), 2023-04-16
Supplement: s1 [file s1]

# Hoja1

| season | odate    | pdate    | ddate    | idrelease | iddevice | idd | puparia | medfly<br>adults | parasitoids | unemerged<br>puparia | medfly<br>emergence | parasitism | medfly<br>mortality | puparia<br>mortality | treatment    |
|--------|----------|----------|----------|-----------|----------|-----|---------|------------------|-------------|----------------------|---------------------|------------|---------------------|----------------------|--------------|
| 2013   | 21-12-12 | 26-12-12 | 02-01-13 | 1         | D1       | d1  | 30      | 13               | 3           | 14                   | 0,43                | 0,10       | 0,57                | 0,47                 | release farm |
| 2013   | 21-12-12 | 26-12-12 | 02-01-13 | 1         | D2       | d2  | 17      | 8                | 2           | 7                    | 0,47                | 0,12       | 0,53                | 0,41                 | release farm |
| 2013   | 21-12-12 | 26-12-12 | 02-01-13 | 1         | D3       | d3  | 31      | 14               | 2           | 15                   | 0,45                | 0,06       | 0,55                | 0,48                 | release farm |
| 2013   | 21-12-12 | 26-12-12 | 02-01-13 | 1         | D4       | d4  | 24      | 10               | 5           | 9                    | 0,42                | 0,21       | 0,58                | 0,38                 | release farm |
| 2013   | 21-12-12 | 26-12-12 | 02-01-13 | 1         | D5       | d5  | 29      | 9                | 3           | 17                   | 0,31                | 0,10       | 0,69                | 0,59                 | release farm |
| 2013   | 21-12-12 | 26-12-12 | 02-01-13 | 1         | D6       | d6  | 22      | 8                | 3           | 11                   | 0,36                | 0,14       | 0,64                | 0,50                 | release farm |
| 2013   | 21-12-12 | 26-12-12 | 02-01-13 | 1         | D7       | d7  | 16      | 7                | 4           | 5                    | 0,44                | 0,25       | 0,56                | 0,31                 | release farm |
| 2013   | 21-12-12 | 26-12-12 | 02-01-13 | 1         | D8       | d8  | 25      | 13               | 2           | 10                   | 0,52                | 0,08       | 0,48                | 0,40                 | release farm |
| 2013   | 21-12-12 | 26-12-12 | 02-01-13 | 1         | D9       | d9  | 19      | 8                | 3           | 8                    | 0,42                | 0,16       | 0,58                | 0,42                 | release farm |
| 2013   | 21-12-12 | 26-12-12 | 02-01-13 | 1         | D10      | d10 | 15      | 6                | 2           | 7                    | 0,40                | 0,13       | 0,60                | 0,47                 | release farm |
| 2013   | 02-01-13 | 07-01-13 | 14-01-13 | 2         | D1       | d11 | 12      | 4                | 4           | 4                    | 0,33                | 0,33       | 0,67                | 0,33                 | release farm |
| 2013   | 02-01-13 | 07-01-13 | 14-01-13 | 2         | D2       | d12 | 21      | 10               | 3           | 8                    | 0,48                | 0,14       | 0,52                | 0,38                 | release farm |
| 2013   | 02-01-13 | 07-01-13 | 14-01-13 | 2         | D3       | d13 | 27      | 11               | 4           | 12                   | 0,41                | 0,15       | 0,59                | 0,44                 | release farm |
| 2013   | 02-01-13 | 07-01-13 | 14-01-13 | 2         | D4       | d14 | 22      | 10               | 1           | 11                   | 0,45                | 0,05       | 0,55                | 0,50                 | release farm |
| 2013   | 02-01-13 | 07-01-13 | 14-01-13 | 2         | D5       | d15 | 29      | 11               | 4           | 14                   | 0,38                | 0,14       | 0,62                | 0,48                 | release farm |
| 2013   | 02-01-13 | 07-01-13 | 14-01-13 | 2         | D6       | d16 | 21      | 8                | 3           | 10                   | 0,38                | 0,14       | 0,62                | 0,48                 | release farm |
| 2013   | 02-01-13 | 07-01-13 | 14-01-13 | 2         | D7       | d17 | 17      | 7                | 2           | 8                    | 0,41                | 0,12       | 0,59                | 0,47                 | release farm |
| 2013   | 02-01-13 | 07-01-13 | 14-01-13 | 2         | D8       | d18 | 20      | 11               | 1           | 8                    | 0,55                | 0,05       | 0,45                | 0,40                 | release farm |
| 2013   | 02-01-13 | 07-01-13 | 14-01-13 | 2         | D9       | d19 | 19      | 10               | 1           | 8                    | 0,53                | 0,05       | 0,47                | 0,42                 | release farm |
| 2013   | 02-01-13 | 07-01-13 | 14-01-13 | 2         | D10      | d20 | 11      | 3                | 1           | 7                    | 0,27                | 0,09       | 0,73                | 0,64                 | release farm |
| 2013   | 14-01-13 | 19-01-13 | 26-01-13 | 3         | D1       | d21 | 20      | 8                | 1           | 11                   | 0,40                | 0,05       | 0,60                | 0,55                 | release farm |
| 2013   | 14-01-13 | 19-01-13 | 26-01-13 | 3         | D2       | d22 | 27      | 10               | 3           | 14                   | 0,37                | 0,11       | 0,63                | 0,52                 | release farm |
| 2013   | 14-01-13 | 19-01-13 | 26-01-13 | 3         | D3       | d23 | 24      | 8                | 3           | 13                   | 0,33                | 0,13       | 0,67                | 0,54                 | release farm |
| 2013   | 14-01-13 | 19-01-13 | 26-01-13 | 3         | D4       | d24 | 18      | 5                | 4           | 9                    | 0,28                | 0,22       | 0,72                | 0,50                 | release farm |
| 2013   | 14-01-13 | 19-01-13 | 26-01-13 | 3         | D5       | d25 | 27      | 12               | 3           | 12                   | 0,44                | 0,11       | 0,56                | 0,44                 | release farm |
| 2013   | 14-01-13 | 19-01-13 | 26-01-13 | 3         | D6       | d26 | 29      | 11               | 5           | 13                   | 0,38                | 0,17       | 0,62                | 0,45                 | release farm |
| 2013   | 14-01-13 | 19-01-13 | 26-01-13 | 3         | D7       | d27 | 16      | 6                | 2           | 8                    | 0,38                | 0,13       | 0,63                | 0,50                 | release farm |
| 2013   | 14-01-13 | 19-01-13 | 26-01-13 | 3         | D8       | d28 | 19      | 5                | 2           | 12                   | 0,26                | 0,11       | 0,74                | 0,63                 | release farm |
| 2013   | 14-01-13 | 19-01-13 | 26-01-13 | 3         | D9       | d29 | 25      | 10               | 3           | 12                   | 0,40                | 0,12       | 0,60                | 0,48                 | release farm |
| 2013   | 14-01-13 | 19-01-13 | 26-01-13 | 3         | D10      | d30 | 11      | 2                | 4           | 5                    | 0,18                | 0,36       | 0,82                | 0,45                 | release farm |
| 2013   | 26-01-13 | 31-01-13 | 07-02-13 | 4         | D1       | d31 | 23      | 8                | 4           | 11                   | 0,35                | 0,17       | 0,65                | 0,48                 | release farm |
| 2013   | 26-01-13 | 31-01-13 | 07-02-13 | 4         | D2       | d32 | 33      | 10               | 2           | 21                   | 0,30                | 0,06       | 0,70                | 0,64                 | release farm |
| 2013   | 26-01-13 | 31-01-13 | 07-02-13 | 4         | D3       | d33 | 25      | 11               | 2           | 12                   | 0,44                | 0,08       | 0,56                | 0,48                 | release farm |
| 2013   | 26-01-13 | 31-01-13 | 07-02-13 | 4         | D4       | d34 | 32      | 10               | 7           | 15                   | 0,31                | 0,22       | 0,69                | 0,47                 | release farm |
| 2013   | 26-01-13 | 31-01-13 | 07-02-13 | 4         | D5       | d35 | 23      | 8                | 1           | 14                   | 0,35                | 0,04       | 0,65                | 0,61                 | release farm |
| 2013   | 26-01-13 | 31-01-13 | 07-02-13 | 4         | D6       | d36 | 21      | 6                | 6           | 9                    | 0,29                | 0,29       | 0,71                | 0,43                 | release farm |
| 2013   | 26-01-13 | 31-01-13 | 07-02-13 | 4         | D7       | d37 | 16      | 2                | 2           | 8                    | 0,13                | 0,13       | 0,63                | 0,50                 | release farm |
| 2013   | 26-01-13 | 31-01-13 | 07-02-13 | 4         | D8       | d38 | 13      | 3                | 5           | 5                    | 0,23                | 0,38       | 0,77                | 0,38                 | release farm |

# Hoja1

|      |          |          |          |   |     |     |    |    |    |    |      |      |      |      |              |
|------|----------|----------|----------|---|-----|-----|----|----|----|----|------|------|------|------|--------------|
| 2013 | 26-01-13 | 31-01-13 | 07-02-13 | 4 | D9  | d39 | 15 | 4  | 3  | 8  | 0,27 | 0,20 | 0,73 | 0,53 | release farm |
| 2013 | 26-01-13 | 31-01-13 | 07-02-13 | 4 | D10 | d40 | 21 | 5  | 6  | 10 | 0,24 | 0,29 | 0,76 | 0,48 | release farm |
| 2013 | 07-02-13 | 12-02-13 | 19-02-13 | 5 | D1  | d41 | 17 | 4  | 3  | 10 | 0,24 | 0,18 | 0,76 | 0,59 | release farm |
| 2013 | 07-02-13 | 12-02-13 | 19-02-13 | 5 | D2  | d42 | 32 | 9  | 2  | 21 | 0,28 | 0,06 | 0,72 | 0,66 | release farm |
| 2013 | 07-02-13 | 12-02-13 | 19-02-13 | 5 | D3  | d43 | 31 | 5  | 3  | 23 | 0,16 | 0,10 | 0,84 | 0,74 | release farm |
| 2013 | 07-02-13 | 12-02-13 | 19-02-13 | 5 | D4  | d44 | 34 | 6  | 5  | 23 | 0,18 | 0,15 | 0,82 | 0,68 | release farm |
| 2013 | 07-02-13 | 12-02-13 | 19-02-13 | 5 | D5  | d45 | 26 | 11 | 3  | 12 | 0,42 | 0,12 | 0,58 | 0,46 | release farm |
| 2013 | 07-02-13 | 12-02-13 | 19-02-13 | 5 | D6  | d46 | 28 | 3  | 1  | 24 | 0,11 | 0,04 | 0,89 | 0,86 | release farm |
| 2013 | 07-02-13 | 12-02-13 | 19-02-13 | 5 | D7  | d47 | 22 | 4  | 3  | 15 | 0,18 | 0,14 | 0,82 | 0,68 | release farm |
| 2013 | 07-02-13 | 12-02-13 | 19-02-13 | 5 | D8  | d48 | 20 | 5  | 1  | 14 | 0,25 | 0,05 | 0,75 | 0,70 | release farm |
| 2013 | 07-02-13 | 12-02-13 | 19-02-13 | 5 | D9  | d49 | 12 | 1  | 1  | 10 | 0,08 | 0,08 | 0,92 | 0,83 | release farm |
| 2013 | 07-02-13 | 12-02-13 | 19-02-13 | 5 | D10 | d50 | 14 | 3  | 1  | 10 | 0,21 | 0,07 | 0,79 | 0,71 | release farm |
| 2013 | 19-02-13 | 25-02-13 | 04-03-13 | 6 | D1  | d51 | 29 | 10 | 10 | 9  | 0,34 | 0,34 | 0,66 | 0,31 | release farm |
| 2013 | 19-02-13 | 25-02-13 | 04-03-13 | 6 | D2  | d52 | 24 | 8  | 4  | 12 | 0,33 | 0,17 | 0,67 | 0,50 | release farm |
| 2013 | 19-02-13 | 25-02-13 | 04-03-13 | 6 | D3  | d53 | 15 | 6  | 2  | 7  | 0,40 | 0,13 | 0,60 | 0,47 | release farm |
| 2013 | 19-02-13 | 25-02-13 | 04-03-13 | 6 | D4  | d54 | 21 | 6  | 6  | 9  | 0,29 | 0,29 | 0,71 | 0,43 | release farm |
| 2013 | 19-02-13 | 25-02-13 | 04-03-13 | 6 | D5  | d55 | 17 | 4  | 5  | 8  | 0,24 | 0,29 | 0,76 | 0,47 | release farm |
| 2013 | 19-02-13 | 25-02-13 | 04-03-13 | 6 | D6  | d56 | 31 | 11 | 7  | 13 | 0,35 | 0,23 | 0,65 | 0,42 | release farm |
| 2013 | 19-02-13 | 25-02-13 | 04-03-13 | 6 | D7  | d57 | 22 | 6  | 6  | 10 | 0,27 | 0,27 | 0,73 | 0,45 | release farm |
| 2013 | 19-02-13 | 25-02-13 | 04-03-13 | 6 | D8  | d58 | 19 | 4  | 4  | 11 | 0,21 | 0,21 | 0,79 | 0,58 | release farm |
| 2013 | 19-02-13 | 25-02-13 | 04-03-13 | 6 | D9  | d59 | 20 | 8  | 7  | 6  | 0,40 | 0,35 | 0,65 | 0,30 | release farm |
| 2013 | 19-02-13 | 25-02-13 | 04-03-13 | 6 | D10 | d60 | 23 | 7  | 9  | 7  | 0,30 | 0,39 | 0,70 | 0,30 | release farm |
| 2013 | 04-03-13 | 09-03-13 | 16-03-13 | 7 | D1  | d61 | 19 | 4  | 3  | 12 | 0,21 | 0,16 | 0,79 | 0,63 | release farm |
| 2013 | 04-03-13 | 09-03-13 | 16-03-13 | 7 | D2  | d62 | 17 | 5  | 3  | 9  | 0,29 | 0,18 | 0,71 | 0,53 | release farm |
| 2013 | 04-03-13 | 09-03-13 | 16-03-13 | 7 | D3  | d63 | 14 | 4  | 3  | 7  | 0,29 | 0,21 | 0,71 | 0,50 | release farm |
| 2013 | 04-03-13 | 09-03-13 | 16-03-13 | 7 | D4  | d64 | 29 | 11 | 6  | 12 | 0,38 | 0,21 | 0,62 | 0,41 | release farm |
| 2013 | 04-03-13 | 09-03-13 | 16-03-13 | 7 | D5  | d65 | 19 | 8  | 3  | 8  | 0,42 | 0,16 | 0,58 | 0,42 | release farm |
| 2013 | 04-03-13 | 09-03-13 | 16-03-13 | 7 | D6  | d66 | 8  | 3  | 1  | 6  | 0,38 | 0,13 | 0,88 | 0,75 | release farm |
| 2013 | 04-03-13 | 09-03-13 | 16-03-13 | 7 | D7  | d67 | 28 | 8  | 5  | 15 | 0,29 | 0,18 | 0,71 | 0,54 | release farm |
| 2013 | 04-03-13 | 09-03-13 | 16-03-13 | 7 | D8  | d68 | 12 | 3  | 2  | 7  | 0,25 | 0,17 | 0,75 | 0,58 | release farm |
| 2013 | 04-03-13 | 09-03-13 | 16-03-13 | 7 | D9  | d69 | 9  | 0  | 3  | 6  | 0,00 | 0,33 | 1,00 | 0,67 | release farm |
| 2013 | 04-03-13 | 09-03-13 | 16-03-13 | 7 | D10 | d70 | 20 | 3  | 2  | 15 | 0,15 | 0,10 | 0,85 | 0,75 | release farm |
| 2013 | 16-03-13 | 21-03-13 | 28-03-13 | 8 | D1  | d71 | 24 | 7  | 4  | 13 | 0,29 | 0,17 | 0,71 | 0,54 | release farm |
| 2013 | 16-03-13 | 21-03-13 | 28-03-13 | 8 | D2  | d72 | 15 | 4  | 4  | 7  | 0,27 | 0,27 | 0,73 | 0,47 | release farm |
| 2013 | 16-03-13 | 21-03-13 | 28-03-13 | 8 | D3  | d73 | 19 | 5  | 3  | 11 | 0,26 | 0,16 | 0,74 | 0,58 | release farm |
| 2013 | 16-03-13 | 21-03-13 | 28-03-13 | 8 | D4  | d74 | 26 | 9  | 5  | 12 | 0,35 | 0,19 | 0,65 | 0,46 | release farm |
| 2013 | 16-03-13 | 21-03-13 | 28-03-13 | 8 | D5  | d75 | 12 | 4  | 3  | 5  | 0,33 | 0,25 | 0,67 | 0,42 | release farm |
| 2013 | 16-03-13 | 21-03-13 | 28-03-13 | 8 | D6  | d76 | 11 | 2  | 4  | 5  | 0,18 | 0,36 | 0,82 | 0,45 | release farm |
| 2013 | 16-03-13 | 21-03-13 | 28-03-13 | 8 | D7  | d77 | 9  | 0  | 1  | 8  | 0,00 | 0,11 | 1,00 | 0,89 | release farm |
| 2013 | 16-03-13 | 21-03-13 | 28-03-13 | 8 | D8  | d78 | 17 | 1  | 3  | 13 | 0,06 | 0,18 | 0,94 | 0,76 | release farm |

# Hojal

|      |          |          |          |    |     |      |    |   |   |    |      |      |      |      |              |
|------|----------|----------|----------|----|-----|------|----|---|---|----|------|------|------|------|--------------|
| 2013 | 16-03-13 | 21-03-13 | 28-03-13 | 8  | D9  | d79  | 12 | 0 | 2 | 10 | 0,00 | 0,17 | 1,00 | 0,83 | release farm |
| 2013 | 16-03-13 | 21-03-13 | 28-03-13 | 8  | D10 | d80  | 13 | 0 | 1 | 12 | 0,00 | 0,08 | 1,00 | 0,92 | release farm |
| 2013 | 28-03-13 | 04-04-13 | 11-04-13 | 9  | D1  | d81  | 10 | 1 | 2 | 7  | 0,10 | 0,20 | 0,90 | 0,70 | release farm |
| 2013 | 28-03-13 | 04-04-13 | 11-04-13 | 9  | D2  | d82  | 13 | 0 | 4 | 9  | 0,00 | 0,31 | 1,00 | 0,69 | release farm |
| 2013 | 28-03-13 | 04-04-13 | 11-04-13 | 9  | D3  | d83  | 10 | 1 | 1 | 8  | 0,10 | 0,10 | 0,90 | 0,80 | release farm |
| 2013 | 28-03-13 | 04-04-13 | 11-04-13 | 9  | D4  | d84  | 14 | 0 | 3 | 11 | 0,00 | 0,21 | 1,00 | 0,79 | release farm |
| 2013 | 28-03-13 | 04-04-13 | 11-04-13 | 9  | D5  | d85  | 13 | 2 | 4 | 7  | 0,15 | 0,31 | 0,85 | 0,54 | release farm |
| 2013 | 28-03-13 | 04-04-13 | 11-04-13 | 9  | D6  | d86  | 14 | 2 | 4 | 8  | 0,14 | 0,29 | 0,86 | 0,57 | release farm |
| 2013 | 28-03-13 | 04-04-13 | 11-04-13 | 9  | D7  | d87  | 10 | 2 | 2 | 6  | 0,20 | 0,20 | 0,80 | 0,60 | release farm |
| 2013 | 28-03-13 | 04-04-13 | 11-04-13 | 9  | D8  | d88  | 12 | 1 | 4 | 7  | 0,08 | 0,33 | 0,92 | 0,58 | release farm |
| 2013 | 28-03-13 | 04-04-13 | 11-04-13 | 9  | D9  | d89  | 10 | 1 | 2 | 7  | 0,10 | 0,20 | 0,90 | 0,70 | release farm |
| 2013 | 28-03-13 | 04-04-13 | 11-04-13 | 9  | D10 | d90  | 15 | 1 | 5 | 9  | 0,07 | 0,33 | 0,93 | 0,60 | release farm |
| 2013 | 11-04-13 | 16-04-13 | 23-04-13 | 10 | D1  | d91  | 17 | 6 | 3 | 8  | 0,35 | 0,18 | 0,65 | 0,47 | release farm |
| 2013 | 11-04-13 | 16-04-13 | 23-04-13 | 10 | D2  | d92  | 13 | 3 | 3 | 7  | 0,23 | 0,23 | 0,77 | 0,54 | release farm |
| 2013 | 11-04-13 | 16-04-13 | 23-04-13 | 10 | D3  | d93  | 9  | 1 | 1 | 7  | 0,11 | 0,11 | 0,89 | 0,78 | release farm |
| 2013 | 11-04-13 | 16-04-13 | 23-04-13 | 10 | D4  | d94  | 11 | 1 | 2 | 8  | 0,09 | 0,18 | 0,91 | 0,73 | release farm |
| 2013 | 11-04-13 | 16-04-13 | 23-04-13 | 10 | D5  | d95  | 8  | 0 | 1 | 7  | 0,00 | 0,13 | 1,00 | 0,88 | release farm |
| 2013 | 11-04-13 | 16-04-13 | 23-04-13 | 10 | D6  | d96  | 10 | 3 | 1 | 6  | 0,30 | 0,10 | 0,70 | 0,60 | release farm |
| 2013 | 11-04-13 | 16-04-13 | 23-04-13 | 10 | D7  | d97  | 6  | 0 | 1 | 5  | 0,00 | 0,17 | 1,00 | 0,83 | release farm |
| 2013 | 11-04-13 | 16-04-13 | 23-04-13 | 10 | D8  | d98  | 7  | 0 | 3 | 4  | 0,00 | 0,43 | 1,00 | 0,57 | release farm |
| 2013 | 11-04-13 | 16-04-13 | 23-04-13 | 10 | D9  | d99  | 5  | 0 | 1 | 4  | 0,00 | 0,20 | 1,00 | 0,80 | release farm |
| 2013 | 11-04-13 | 16-04-13 | 23-04-13 | 10 | D10 | d100 | 6  | 0 | 3 | 3  | 0,00 | 0,50 | 1,00 | 0,50 | release farm |
| 2013 | 23-04-13 | 28-04-13 | 05-05-13 | 11 | D1  | d101 | 10 | 2 | 2 | 6  | 0,20 | 0,20 | 0,80 | 0,60 | release farm |
| 2013 | 23-04-13 | 28-04-13 | 05-05-13 | 11 | D2  | d102 | 8  | 0 | 3 | 5  | 0,00 | 0,38 | 1,00 | 0,63 | release farm |
| 2013 | 23-04-13 | 28-04-13 | 05-05-13 | 11 | D3  | d103 | 9  | 1 | 3 | 5  | 0,11 | 0,33 | 0,89 | 0,56 | release farm |
| 2013 | 23-04-13 | 28-04-13 | 05-05-13 | 11 | D4  | d104 | 11 | 0 | 4 | 7  | 0,00 | 0,36 | 1,00 | 0,64 | release farm |
| 2013 | 23-04-13 | 28-04-13 | 05-05-13 | 11 | D5  | d105 | 7  | 0 | 0 | 7  | 0,00 | 0,00 | 1,00 | 1,00 | release farm |
| 2013 | 23-04-13 | 28-04-13 | 05-05-13 | 11 | D6  | d106 | 9  | 1 | 2 | 6  | 0,11 | 0,22 | 0,89 | 0,67 | release farm |
| 2013 | 23-04-13 | 28-04-13 | 05-05-13 | 11 | D7  | d107 | 10 | 0 | 4 | 6  | 0,00 | 0,40 | 1,00 | 0,60 | release farm |
| 2013 | 23-04-13 | 28-04-13 | 05-05-13 | 11 | D8  | d108 | 7  | 1 | 1 | 5  | 0,14 | 0,14 | 0,86 | 0,71 | release farm |
| 2013 | 23-04-13 | 28-04-13 | 05-05-13 | 11 | D9  | d109 | 8  | 1 | 1 | 6  | 0,13 | 0,13 | 0,88 | 0,75 | release farm |
| 2013 | 23-04-13 | 28-04-13 | 05-05-13 | 11 | D10 | d110 | 4  | 0 | 0 | 4  | 0,00 | 0,00 | 1,00 | 1,00 | release farm |
| 2013 | 05-05-13 | 10-05-13 | 17-05-13 | 12 | D1  | d111 | 6  | 1 | 1 | 4  | 0,17 | 0,17 | 0,83 | 0,67 | release farm |
| 2013 | 05-05-13 | 10-05-13 | 17-05-13 | 12 | D2  | d112 | 5  | 0 | 1 | 4  | 0,00 | 0,20 | 1,00 | 0,80 | release farm |
| 2013 | 05-05-13 | 10-05-13 | 17-05-13 | 12 | D3  | d113 | 10 | 2 | 1 | 7  | 0,20 | 0,10 | 0,80 | 0,70 | release farm |
| 2013 | 05-05-13 | 10-05-13 | 17-05-13 | 12 | D4  | d114 | 7  | 1 | 1 | 5  | 0,14 | 0,14 | 0,86 | 0,71 | release farm |
| 2013 | 05-05-13 | 10-05-13 | 17-05-13 | 12 | D5  | d115 | 6  | 1 | 2 | 3  | 0,17 | 0,33 | 0,83 | 0,50 | release farm |
| 2013 | 05-05-13 | 10-05-13 | 17-05-13 | 12 | D6  | d116 | 0  | 0 | 0 | 0  | 0,00 | 0,00 | 0,00 | 0,00 | release farm |
| 2013 | 05-05-13 | 10-05-13 | 17-05-13 | 12 | D7  | d117 | 7  | 1 | 1 | 5  | 0,14 | 0,14 | 0,86 | 0,71 | release farm |
| 2013 | 05-05-13 | 10-05-13 | 17-05-13 | 12 | D8  | d118 | 4  | 0 | 0 | 4  | 0,00 | 0,00 | 1,00 | 1,00 | release farm |

# Hoja1

|      |          |          |          |    |     |      |    |    |    |    |      |      |      |      |              |
|------|----------|----------|----------|----|-----|------|----|----|----|----|------|------|------|------|--------------|
| 2013 | 05-05-13 | 10-05-13 | 17-05-13 | 12 | D9  | d119 | 3  | 0  | 1  | 2  | 0,00 | 0,33 | 1,00 | 0,67 | release farm |
| 2013 | 05-05-13 | 10-05-13 | 17-05-13 | 12 | D10 | d120 | 6  | 0  | 1  | 5  | 0,00 | 0,17 | 1,00 | 0,83 | release farm |
| 2013 | 17-05-13 | 23-05-13 | 30-05-13 | 13 | D1  | d121 | 5  | 1  | 1  | 3  | 0,20 | 0,20 | 0,80 | 0,60 | release farm |
| 2013 | 17-05-13 | 23-05-13 | 30-05-13 | 13 | D2  | d122 | 6  | 1  | 1  | 4  | 0,17 | 0,17 | 0,83 | 0,67 | release farm |
| 2013 | 17-05-13 | 23-05-13 | 30-05-13 | 13 | D3  | d123 | 4  | 0  | 1  | 3  | 0,00 | 0,25 | 1,00 | 0,75 | release farm |
| 2013 | 17-05-13 | 23-05-13 | 30-05-13 | 13 | D4  | d124 | 8  | 1  | 2  | 5  | 0,13 | 0,25 | 0,88 | 0,63 | release farm |
| 2013 | 17-05-13 | 23-05-13 | 30-05-13 | 13 | D5  | d125 | 4  | 0  | 1  | 3  | 0,00 | 0,25 | 1,00 | 0,75 | release farm |
| 2013 | 17-05-13 | 23-05-13 | 30-05-13 | 13 | D6  | d126 | 3  | 0  | 1  | 2  | 0,00 | 0,33 | 1,00 | 0,67 | release farm |
| 2013 | 17-05-13 | 23-05-13 | 30-05-13 | 13 | D7  | d127 | 0  | 0  | 0  | 0  | 0,00 | 0,00 | 0,00 | 0,00 | release farm |
| 2013 | 17-05-13 | 23-05-13 | 30-05-13 | 13 | D8  | d128 | 4  | 0  | 0  | 4  | 0,00 | 0,00 | 1,00 | 1,00 | release farm |
| 2013 | 17-05-13 | 23-05-13 | 30-05-13 | 13 | D9  | d129 | 0  | 0  | 0  | 0  | 0,00 | 0,00 | 0,00 | 0,00 | release farm |
| 2013 | 17-05-13 | 23-05-13 | 30-05-13 | 13 | D10 | d130 | 2  | 0  | 1  | 1  | 0,00 | 0,50 | 1,00 | 0,50 | release farm |
| 2014 | 20-12-13 | 26-12-13 | 02-01-14 | 1  | D1  | d131 | 22 | 10 | 3  | 9  | 0,45 | 0,14 | 0,55 | 0,41 | release farm |
| 2014 | 20-12-13 | 26-12-13 | 02-01-14 | 1  | D2  | d132 | 31 | 11 | 8  | 12 | 0,35 | 0,26 | 0,65 | 0,39 | release farm |
| 2014 | 20-12-13 | 26-12-13 | 02-01-14 | 1  | D3  | d133 | 21 | 9  | 3  | 9  | 0,43 | 0,14 | 0,57 | 0,43 | release farm |
| 2014 | 20-12-13 | 26-12-13 | 02-01-14 | 1  | D4  | d134 | 13 | 5  | 2  | 6  | 0,38 | 0,15 | 0,62 | 0,46 | release farm |
| 2014 | 20-12-13 | 26-12-13 | 02-01-14 | 1  | D5  | d135 | 16 | 7  | 2  | 7  | 0,44 | 0,13 | 0,56 | 0,44 | release farm |
| 2014 | 20-12-13 | 26-12-13 | 02-01-14 | 1  | D6  | d136 | 24 | 6  | 6  | 12 | 0,25 | 0,25 | 0,75 | 0,50 | release farm |
| 2014 | 20-12-13 | 26-12-13 | 02-01-14 | 1  | D7  | d137 | 16 | 5  | 3  | 8  | 0,31 | 0,19 | 0,69 | 0,50 | release farm |
| 2014 | 20-12-13 | 26-12-13 | 02-01-14 | 1  | D8  | d138 | 11 | 4  | 2  | 5  | 0,36 | 0,18 | 0,64 | 0,45 | release farm |
| 2014 | 20-12-13 | 26-12-13 | 02-01-14 | 1  | D9  | d139 | 19 | 11 | 2  | 6  | 0,58 | 0,11 | 0,42 | 0,32 | release farm |
| 2014 | 20-12-13 | 26-12-13 | 02-01-14 | 1  | D10 | d140 | 14 | 6  | 4  | 4  | 0,43 | 0,29 | 0,57 | 0,29 | release farm |
| 2014 | 02-01-14 | 07-01-14 | 14-01-14 | 2  | D1  | d141 | 23 | 6  | 10 | 7  | 0,26 | 0,43 | 0,74 | 0,30 | release farm |
| 2014 | 02-01-14 | 07-01-14 | 14-01-14 | 2  | D2  | d142 | 24 | 9  | 3  | 12 | 0,38 | 0,13 | 0,63 | 0,50 | release farm |
| 2014 | 02-01-14 | 07-01-14 | 14-01-14 | 2  | D3  | d143 | 19 | 6  | 4  | 9  | 0,32 | 0,21 | 0,68 | 0,47 | release farm |
| 2014 | 02-01-14 | 07-01-14 | 14-01-14 | 2  | D4  | d144 | 23 | 7  | 8  | 8  | 0,30 | 0,35 | 0,70 | 0,35 | release farm |
| 2014 | 02-01-14 | 07-01-14 | 14-01-14 | 2  | D5  | d145 | 16 | 4  | 7  | 5  | 0,25 | 0,44 | 0,75 | 0,31 | release farm |
| 2014 | 02-01-14 | 07-01-14 | 14-01-14 | 2  | D6  | d146 | 22 | 6  | 5  | 11 | 0,27 | 0,23 | 0,73 | 0,50 | release farm |
| 2014 | 02-01-14 | 07-01-14 | 14-01-14 | 2  | D7  | d147 | 16 | 7  | 3  | 6  | 0,44 | 0,19 | 0,56 | 0,38 | release farm |
| 2014 | 02-01-14 | 07-01-14 | 14-01-14 | 2  | D8  | d148 | 26 | 10 | 3  | 13 | 0,38 | 0,12 | 0,62 | 0,50 | release farm |
| 2014 | 02-01-14 | 07-01-14 | 14-01-14 | 2  | D9  | d149 | 24 | 14 | 3  | 7  | 0,58 | 0,13 | 0,42 | 0,29 | release farm |
| 2014 | 02-01-14 | 07-01-14 | 14-01-14 | 2  | D10 | d150 | 18 | 6  | 6  | 6  | 0,33 | 0,33 | 0,67 | 0,33 | release farm |
| 2014 | 14-01-14 | 19-01-14 | 26-01-14 | 3  | D1  | d151 | 23 | 7  | 7  | 9  | 0,30 | 0,30 | 0,70 | 0,39 | release farm |
| 2014 | 14-01-14 | 19-01-14 | 26-01-14 | 3  | D2  | d152 | 21 | 6  | 7  | 8  | 0,29 | 0,33 | 0,71 | 0,38 | release farm |
| 2014 | 14-01-14 | 19-01-14 | 26-01-14 | 3  | D3  | d153 | 15 | 4  | 3  | 8  | 0,27 | 0,20 | 0,73 | 0,53 | release farm |
| 2014 | 14-01-14 | 19-01-14 | 26-01-14 | 3  | D4  | d154 | 20 | 8  | 3  | 9  | 0,40 | 0,15 | 0,60 | 0,45 | release farm |
| 2014 | 14-01-14 | 19-01-14 | 26-01-14 | 3  | D5  | d155 | 19 | 5  | 6  | 8  | 0,26 | 0,32 | 0,74 | 0,42 | release farm |
| 2014 | 14-01-14 | 19-01-14 | 26-01-14 | 3  | D6  | d156 | 22 | 9  | 5  | 8  | 0,41 | 0,23 | 0,59 | 0,36 | release farm |
| 2014 | 14-01-14 | 19-01-14 | 26-01-14 | 3  | D7  | d157 | 20 | 7  | 4  | 9  | 0,35 | 0,20 | 0,65 | 0,45 | release farm |
| 2014 | 14-01-14 | 19-01-14 | 26-01-14 | 3  | D8  | d158 | 27 | 9  | 9  | 9  | 0,33 | 0,33 | 0,67 | 0,33 | release farm |

# Hoja1

|      |          |          |          |   |     |      |    |   |   |    |      |      |      |      |              |
|------|----------|----------|----------|---|-----|------|----|---|---|----|------|------|------|------|--------------|
| 2014 | 14-01-14 | 19-01-14 | 26-01-14 | 3 | D9  | d159 | 17 | 6 | 4 | 7  | 0,35 | 0,24 | 0,65 | 0,41 | release farm |
| 2014 | 14-01-14 | 19-01-14 | 26-01-14 | 3 | D10 | d160 | 18 | 1 | 5 | 12 | 0,06 | 0,28 | 0,94 | 0,67 | release farm |
| 2014 | 26-01-14 | 31-01-14 | 07-02-14 | 4 | D1  | d161 | 16 | 5 | 5 | 6  | 0,31 | 0,31 | 0,69 | 0,38 | release farm |
| 2014 | 26-01-14 | 31-01-14 | 07-02-14 | 4 | D2  | d162 | 21 | 6 | 9 | 6  | 0,29 | 0,43 | 0,71 | 0,29 | release farm |
| 2014 | 26-01-14 | 31-01-14 | 07-02-14 | 4 | D3  | d163 | 12 | 4 | 2 | 6  | 0,33 | 0,17 | 0,67 | 0,50 | release farm |
| 2014 | 26-01-14 | 31-01-14 | 07-02-14 | 4 | D4  | d164 | 20 | 6 | 7 | 7  | 0,30 | 0,35 | 0,70 | 0,35 | release farm |
| 2014 | 26-01-14 | 31-01-14 | 07-02-14 | 4 | D5  | d165 | 14 | 5 | 4 | 5  | 0,36 | 0,29 | 0,64 | 0,36 | release farm |
| 2014 | 26-01-14 | 31-01-14 | 07-02-14 | 4 | D6  | d166 | 11 | 4 | 3 | 4  | 0,36 | 0,27 | 0,64 | 0,36 | release farm |
| 2014 | 26-01-14 | 31-01-14 | 07-02-14 | 4 | D7  | d167 | 15 | 6 | 3 | 6  | 0,40 | 0,20 | 0,60 | 0,40 | release farm |
| 2014 | 26-01-14 | 31-01-14 | 07-02-14 | 4 | D8  | d168 | 10 | 3 | 3 | 4  | 0,30 | 0,30 | 0,70 | 0,40 | release farm |
| 2014 | 26-01-14 | 31-01-14 | 07-02-14 | 4 | D9  | d169 | 13 | 2 | 5 | 6  | 0,15 | 0,38 | 0,85 | 0,46 | release farm |
| 2014 | 26-01-14 | 31-01-14 | 07-02-14 | 4 | D10 | d170 | 14 | 3 | 3 | 8  | 0,21 | 0,21 | 0,79 | 0,57 | release farm |
| 2014 | 26-01-14 | 31-01-14 | 07-02-14 | 5 | D1  | d171 | 22 | 7 | 7 | 8  | 0,32 | 0,32 | 0,68 | 0,36 | release farm |
| 2014 | 26-01-14 | 31-01-14 | 07-02-14 | 5 | D2  | d172 | 16 | 5 | 4 | 7  | 0,31 | 0,25 | 0,69 | 0,44 | release farm |
| 2014 | 26-01-14 | 31-01-14 | 07-02-14 | 5 | D3  | d173 | 13 | 6 | 4 | 3  | 0,46 | 0,31 | 0,54 | 0,23 | release farm |
| 2014 | 26-01-14 | 31-01-14 | 07-02-14 | 5 | D4  | d174 | 18 | 7 | 5 | 6  | 0,39 | 0,28 | 0,61 | 0,33 | release farm |
| 2014 | 26-01-14 | 31-01-14 | 07-02-14 | 5 | D5  | d175 | 10 | 2 | 4 | 4  | 0,20 | 0,40 | 0,80 | 0,40 | release farm |
| 2014 | 26-01-14 | 31-01-14 | 07-02-14 | 5 | D6  | d176 | 14 | 4 | 4 | 6  | 0,29 | 0,29 | 0,71 | 0,43 | release farm |
| 2014 | 26-01-14 | 31-01-14 | 07-02-14 | 5 | D7  | d177 | 15 | 6 | 2 | 7  | 0,40 | 0,13 | 0,60 | 0,47 | release farm |
| 2014 | 26-01-14 | 31-01-14 | 07-02-14 | 5 | D8  | d178 | 9  | 2 | 3 | 4  | 0,22 | 0,33 | 0,78 | 0,44 | release farm |
| 2014 | 26-01-14 | 31-01-14 | 07-02-14 | 5 | D9  | d179 | 10 | 3 | 2 | 5  | 0,30 | 0,20 | 0,70 | 0,50 | release farm |
| 2014 | 26-01-14 | 31-01-14 | 07-02-14 | 5 | D10 | d180 | 12 | 2 | 3 | 7  | 0,17 | 0,25 | 0,83 | 0,58 | release farm |
| 2014 | 19-02-14 | 25-02-14 | 04-03-14 | 6 | D1  | d181 | 14 | 4 | 5 | 5  | 0,29 | 0,36 | 0,71 | 0,36 | release farm |
| 2014 | 19-02-14 | 25-02-14 | 04-03-14 | 6 | D2  | d182 | 8  | 1 | 2 | 5  | 0,13 | 0,25 | 0,88 | 0,63 | release farm |
| 2014 | 19-02-14 | 25-02-14 | 04-03-14 | 6 | D3  | d183 | 17 | 5 | 5 | 7  | 0,29 | 0,29 | 0,71 | 0,41 | release farm |
| 2014 | 19-02-14 | 25-02-14 | 04-03-14 | 6 | D4  | d184 | 12 | 3 | 4 | 5  | 0,25 | 0,33 | 0,75 | 0,42 | release farm |
| 2014 | 19-02-14 | 25-02-14 | 04-03-14 | 6 | D5  | d185 | 18 | 5 | 5 | 8  | 0,28 | 0,28 | 0,72 | 0,44 | release farm |
| 2014 | 19-02-14 | 25-02-14 | 04-03-14 | 6 | D6  | d186 | 20 | 7 | 6 | 7  | 0,35 | 0,30 | 0,65 | 0,35 | release farm |
| 2014 | 19-02-14 | 25-02-14 | 04-03-14 | 6 | D7  | d187 | 14 | 6 | 2 | 6  | 0,43 | 0,14 | 0,57 | 0,43 | release farm |
| 2014 | 19-02-14 | 25-02-14 | 04-03-14 | 6 | D8  | d188 | 16 | 4 | 3 | 9  | 0,25 | 0,19 | 0,75 | 0,56 | release farm |
| 2014 | 19-02-14 | 25-02-14 | 04-03-14 | 6 | D9  | d189 | 10 | 2 | 3 | 5  | 0,20 | 0,30 | 0,80 | 0,50 | release farm |
| 2014 | 19-02-14 | 25-02-14 | 04-03-14 | 6 | D10 | d190 | 12 | 4 | 2 | 6  | 0,33 | 0,17 | 0,67 | 0,50 | release farm |
| 2014 | 04-03-14 | 09-03-14 | 16-03-14 | 7 | D1  | d191 | 12 | 2 | 5 | 5  | 0,17 | 0,42 | 0,83 | 0,42 | release farm |
| 2014 | 04-03-14 | 09-03-14 | 16-03-14 | 7 | D2  | d192 | 17 | 4 | 3 | 10 | 0,24 | 0,18 | 0,76 | 0,59 | release farm |
| 2014 | 04-03-14 | 09-03-14 | 16-03-14 | 7 | D3  | d193 | 10 | 2 | 4 | 4  | 0,20 | 0,40 | 0,80 | 0,40 | release farm |
| 2014 | 04-03-14 | 09-03-14 | 16-03-14 | 7 | D4  | d194 | 11 | 3 | 3 | 5  | 0,27 | 0,27 | 0,73 | 0,45 | release farm |
| 2014 | 04-03-14 | 09-03-14 | 16-03-14 | 7 | D5  | d195 | 13 | 2 | 5 | 6  | 0,15 | 0,38 | 0,85 | 0,46 | release farm |
| 2014 | 04-03-14 | 09-03-14 | 16-03-14 | 7 | D6  | d196 | 10 | 3 | 3 | 4  | 0,30 | 0,30 | 0,70 | 0,40 | release farm |
| 2014 | 04-03-14 | 09-03-14 | 16-03-14 | 7 | D7  | d197 | 12 | 2 | 4 | 6  | 0,17 | 0,33 | 0,83 | 0,50 | release farm |
| 2014 | 04-03-14 | 09-03-14 | 16-03-14 | 7 | D8  | d198 | 10 | 1 | 3 | 6  | 0,10 | 0,30 | 0,90 | 0,60 | release farm |

# Hoja1

|      |          |          |          |    |     |      |    |   |   |    |      |      |      |      |              |
|------|----------|----------|----------|----|-----|------|----|---|---|----|------|------|------|------|--------------|
| 2014 | 04-03-14 | 09-03-14 | 16-03-14 | 7  | D9  | d199 | 11 | 2 | 2 | 7  | 0,18 | 0,18 | 0,82 | 0,64 | release farm |
| 2014 | 04-03-14 | 09-03-14 | 16-03-14 | 7  | D10 | d200 | 10 | 1 | 3 | 6  | 0,10 | 0,30 | 0,90 | 0,60 | release farm |
| 2014 | 16-03-14 | 21-03-14 | 28-03-14 | 8  | D1  | d201 | 13 | 1 | 4 | 8  | 0,08 | 0,31 | 0,92 | 0,62 | release farm |
| 2014 | 16-03-14 | 21-03-14 | 28-03-14 | 8  | D2  | d202 | 9  | 2 | 5 | 5  | 0,22 | 0,56 | 1,11 | 0,56 | release farm |
| 2014 | 16-03-14 | 21-03-14 | 28-03-14 | 8  | D3  | d203 | 21 | 7 | 6 | 8  | 0,33 | 0,29 | 0,67 | 0,38 | release farm |
| 2014 | 16-03-14 | 21-03-14 | 28-03-14 | 8  | D4  | d204 | 14 | 6 | 4 | 4  | 0,43 | 0,29 | 0,57 | 0,29 | release farm |
| 2014 | 16-03-14 | 21-03-14 | 28-03-14 | 8  | D5  | d205 | 10 | 1 | 4 | 5  | 0,10 | 0,40 | 0,90 | 0,50 | release farm |
| 2014 | 16-03-14 | 21-03-14 | 28-03-14 | 8  | D6  | d206 | 16 | 3 | 6 | 7  | 0,19 | 0,38 | 0,81 | 0,44 | release farm |
| 2014 | 16-03-14 | 21-03-14 | 28-03-14 | 8  | D7  | d207 | 11 | 2 | 4 | 5  | 0,18 | 0,36 | 0,82 | 0,45 | release farm |
| 2014 | 16-03-14 | 21-03-14 | 28-03-14 | 8  | D8  | d208 | 10 | 2 | 4 | 4  | 0,20 | 0,40 | 0,80 | 0,40 | release farm |
| 2014 | 16-03-14 | 21-03-14 | 28-03-14 | 8  | D9  | d209 | 12 | 3 | 3 | 6  | 0,25 | 0,25 | 0,75 | 0,50 | release farm |
| 2014 | 16-03-14 | 21-03-14 | 28-03-14 | 8  | D10 | d210 | 14 | 2 | 1 | 11 | 0,14 | 0,07 | 0,86 | 0,79 | release farm |
| 2014 | 28-03-14 | 04-04-14 | 11-04-14 | 9  | D1  | d211 | 18 | 5 | 6 | 7  | 0,28 | 0,33 | 0,72 | 0,39 | release farm |
| 2014 | 28-03-14 | 04-04-14 | 11-04-14 | 9  | D2  | d212 | 14 | 4 | 5 | 5  | 0,29 | 0,36 | 0,71 | 0,36 | release farm |
| 2014 | 28-03-14 | 04-04-14 | 11-04-14 | 9  | D3  | d213 | 9  | 2 | 3 | 4  | 0,22 | 0,33 | 0,78 | 0,44 | release farm |
| 2014 | 28-03-14 | 04-04-14 | 11-04-14 | 9  | D4  | d214 | 11 | 2 | 5 | 4  | 0,18 | 0,45 | 0,82 | 0,36 | release farm |
| 2014 | 28-03-14 | 04-04-14 | 11-04-14 | 9  | D5  | d215 | 12 | 3 | 3 | 6  | 0,25 | 0,25 | 0,75 | 0,50 | release farm |
| 2014 | 28-03-14 | 04-04-14 | 11-04-14 | 9  | D6  | d216 | 10 | 1 | 5 | 4  | 0,10 | 0,50 | 0,90 | 0,40 | release farm |
| 2014 | 28-03-14 | 04-04-14 | 11-04-14 | 9  | D7  | d217 | 9  | 1 | 4 | 4  | 0,11 | 0,44 | 0,89 | 0,44 | release farm |
| 2014 | 28-03-14 | 04-04-14 | 11-04-14 | 9  | D8  | d218 | 10 | 1 | 3 | 6  | 0,10 | 0,30 | 0,90 | 0,60 | release farm |
| 2014 | 28-03-14 | 04-04-14 | 11-04-14 | 9  | D9  | d219 | 11 | 1 | 3 | 7  | 0,09 | 0,27 | 0,91 | 0,64 | release farm |
| 2014 | 28-03-14 | 04-04-14 | 11-04-14 | 9  | D10 | d220 | 10 | 1 | 3 | 6  | 0,10 | 0,30 | 0,90 | 0,60 | release farm |
| 2014 | 11-04-14 | 16-04-14 | 23-04-14 | 10 | D1  | d221 | 14 | 2 | 4 | 8  | 0,14 | 0,29 | 0,86 | 0,57 | release farm |
| 2014 | 11-04-14 | 16-04-14 | 23-04-14 | 10 | D2  | d222 | 12 | 3 | 4 | 5  | 0,25 | 0,33 | 0,75 | 0,42 | release farm |
| 2014 | 11-04-14 | 16-04-14 | 23-04-14 | 10 | D3  | d223 | 11 | 0 | 5 | 6  | 0,00 | 0,45 | 1,00 | 0,55 | release farm |
| 2014 | 11-04-14 | 16-04-14 | 23-04-14 | 10 | D4  | d224 | 9  | 0 | 4 | 5  | 0,00 | 0,44 | 1,00 | 0,56 | release farm |
| 2014 | 11-04-14 | 16-04-14 | 23-04-14 | 10 | D5  | d225 | 10 | 1 | 2 | 7  | 0,10 | 0,20 | 0,90 | 0,70 | release farm |
| 2014 | 11-04-14 | 16-04-14 | 23-04-14 | 10 | D6  | d226 | 8  | 0 | 3 | 5  | 0,00 | 0,38 | 1,00 | 0,63 | release farm |
| 2014 | 11-04-14 | 16-04-14 | 23-04-14 | 10 | D7  | d227 | 11 | 0 | 3 | 8  | 0,00 | 0,27 | 1,00 | 0,73 | release farm |
| 2014 | 11-04-14 | 16-04-14 | 23-04-14 | 10 | D8  | d228 | 9  | 0 | 3 | 6  | 0,00 | 0,33 | 1,00 | 0,67 | release farm |
| 2014 | 11-04-14 | 16-04-14 | 23-04-14 | 10 | D9  | d229 | 10 | 0 | 2 | 8  | 0,00 | 0,20 | 1,00 | 0,80 | release farm |
| 2014 | 11-04-14 | 16-04-14 | 23-04-14 | 10 | D10 | d230 | 11 | 1 | 2 | 8  | 0,09 | 0,18 | 0,91 | 0,73 | release farm |
| 2014 | 23-04-14 | 28-04-14 | 05-05-14 | 11 | D1  | d231 | 6  | 0 | 3 | 3  | 0,00 | 0,50 | 1,00 | 0,50 | release farm |
| 2014 | 23-04-14 | 28-04-14 | 05-05-14 | 11 | D2  | d232 | 8  | 1 | 2 | 5  | 0,13 | 0,25 | 0,88 | 0,63 | release farm |
| 2014 | 23-04-14 | 28-04-14 | 05-05-14 | 11 | D3  | d233 | 9  | 0 | 3 | 6  | 0,00 | 0,33 | 1,00 | 0,67 | release farm |
| 2014 | 23-04-14 | 28-04-14 | 05-05-14 | 11 | D4  | d234 | 6  | 1 | 2 | 3  | 0,17 | 0,33 | 0,83 | 0,50 | release farm |
| 2014 | 23-04-14 | 28-04-14 | 05-05-14 | 11 | D5  | d235 | 12 | 1 | 4 | 7  | 0,08 | 0,33 | 0,92 | 0,58 | release farm |
| 2014 | 23-04-14 | 28-04-14 | 05-05-14 | 11 | D6  | d236 | 9  | 1 | 1 | 7  | 0,11 | 0,11 | 0,89 | 0,78 | release farm |
| 2014 | 23-04-14 | 28-04-14 | 05-05-14 | 11 | D7  | d237 | 8  | 0 | 3 | 5  | 0,00 | 0,38 | 1,00 | 0,63 | release farm |
| 2014 | 23-04-14 | 28-04-14 | 05-05-14 | 11 | D8  | d238 | 6  | 0 | 1 | 5  | 0,00 | 0,17 | 1,00 | 0,83 | release farm |

# Hoja1

|      |          |          |          |    |     |      |    |    |   |    |      |      |      |      |                  |
|------|----------|----------|----------|----|-----|------|----|----|---|----|------|------|------|------|------------------|
| 2014 | 23-04-14 | 28-04-14 | 05-05-14 | 11 | D9  | d239 | 5  | 0  | 1 | 4  | 0,00 | 0,20 | 1,00 | 0,80 | release farm     |
| 2014 | 23-04-14 | 28-04-14 | 05-05-14 | 11 | D10 | d240 | 0  | 0  | 0 | 0  | 0,00 | 0,00 | 0,00 | 0,00 | release farm     |
| 2014 | 05-05-14 | 10-05-14 | 17-05-14 | 12 | D1  | d241 | 10 | 1  | 4 | 5  | 0,10 | 0,40 | 0,90 | 0,50 | release farm     |
| 2014 | 05-05-14 | 10-05-14 | 17-05-14 | 12 | D2  | d242 | 8  | 0  | 2 | 6  | 0,00 | 0,25 | 1,00 | 0,75 | release farm     |
| 2014 | 05-05-14 | 10-05-14 | 17-05-14 | 12 | D3  | d243 | 6  | 0  | 1 | 5  | 0,00 | 0,17 | 1,00 | 0,83 | release farm     |
| 2014 | 05-05-14 | 10-05-14 | 17-05-14 | 12 | D4  | d244 | 8  | 0  | 2 | 6  | 0,00 | 0,25 | 1,00 | 0,75 | release farm     |
| 2014 | 05-05-14 | 10-05-14 | 17-05-14 | 12 | D5  | d245 | 6  | 1  | 2 | 3  | 0,17 | 0,33 | 0,83 | 0,50 | release farm     |
| 2014 | 05-05-14 | 10-05-14 | 17-05-14 | 12 | D6  | d246 | 8  | 0  | 2 | 6  | 0,00 | 0,25 | 1,00 | 0,75 | release farm     |
| 2014 | 05-05-14 | 10-05-14 | 17-05-14 | 12 | D7  | d247 | 0  | 0  | 0 | 0  | 0,00 | 0,00 | 0,00 | 0,00 | release farm     |
| 2014 | 05-05-14 | 10-05-14 | 17-05-14 | 12 | D8  | d248 | 8  | 0  | 3 | 5  | 0,00 | 0,38 | 1,00 | 0,63 | release farm     |
| 2014 | 05-05-14 | 10-05-14 | 17-05-14 | 12 | D9  | d249 | 6  | 0  | 2 | 4  | 0,00 | 0,33 | 1,00 | 0,67 | release farm     |
| 2014 | 05-05-14 | 10-05-14 | 17-05-14 | 12 | D10 | d250 | 0  | 0  | 0 | 0  | 0,00 | 0,00 | 0,00 | 0,00 | release farm     |
| 2014 | 17-05-14 | 23-05-14 | 30-05-14 | 13 | D1  | d251 | 8  | 1  | 2 | 5  | 0,13 | 0,25 | 0,88 | 0,63 | release farm     |
| 2014 | 17-05-14 | 23-05-14 | 30-05-14 | 13 | D2  | d252 | 9  | 0  | 3 | 6  | 0,00 | 0,33 | 1,00 | 0,67 | release farm     |
| 2014 | 17-05-14 | 23-05-14 | 30-05-14 | 13 | D3  | d253 | 6  | 0  | 2 | 4  | 0,00 | 0,33 | 1,00 | 0,67 | release farm     |
| 2014 | 17-05-14 | 23-05-14 | 30-05-14 | 13 | D4  | d254 | 4  | 0  | 1 | 3  | 0,00 | 0,25 | 1,00 | 0,75 | release farm     |
| 2014 | 17-05-14 | 23-05-14 | 30-05-14 | 13 | D5  | d255 | 6  | 0  | 2 | 4  | 0,00 | 0,33 | 1,00 | 0,67 | release farm     |
| 2014 | 17-05-14 | 23-05-14 | 30-05-14 | 13 | D6  | d256 | 4  | 0  | 1 | 3  | 0,00 | 0,25 | 1,00 | 0,75 | release farm     |
| 2014 | 17-05-14 | 23-05-14 | 30-05-14 | 13 | D7  | d257 | 9  | 0  | 2 | 7  | 0,00 | 0,22 | 1,00 | 0,78 | release farm     |
| 2014 | 17-05-14 | 23-05-14 | 30-05-14 | 13 | D8  | d258 | 0  | 0  | 0 | 0  | 0,00 | 0,00 | 0,00 | 0,00 | release farm     |
| 2014 | 17-05-14 | 23-05-14 | 30-05-14 | 13 | D9  | d259 | 0  | 0  | 0 | 0  | 0,00 | 0,00 | 0,00 | 0,00 | release farm     |
| 2014 | 17-05-14 | 23-05-14 | 30-05-14 | 13 | D10 | d260 | 0  | 0  | 0 | 0  | 0,00 | 0,00 | 0,00 | 0,00 | release farm     |
| 2013 | 21-12-12 | 26-12-12 | 02-01-13 | 1  | D1  | d261 | 28 | 15 | 0 | 13 | 0,54 | 0,00 | 0,46 | 0,46 | non release farm |
| 2013 | 21-12-12 | 26-12-12 | 02-01-13 | 1  | D2  | d262 | 11 | 7  | 0 | 4  | 0,64 | 0,00 | 0,36 | 0,36 | non release farm |
| 2013 | 21-12-12 | 26-12-12 | 02-01-13 | 1  | D3  | d263 | 20 | 12 | 0 | 8  | 0,60 | 0,00 | 0,40 | 0,40 | non release farm |
| 2013 | 21-12-12 | 26-12-12 | 02-01-13 | 1  | D4  | d264 | 16 | 10 | 0 | 6  | 0,63 | 0,00 | 0,38 | 0,38 | non release farm |
| 2013 | 21-12-12 | 26-12-12 | 02-01-13 | 1  | D5  | d265 | 23 | 18 | 0 | 5  | 0,78 | 0,00 | 0,22 | 0,22 | non release farm |
| 2013 | 21-12-12 | 26-12-12 | 02-01-13 | 1  | D6  | d266 | 22 | 15 | 0 | 7  | 0,68 | 0,00 | 0,32 | 0,32 | non release farm |
| 2013 | 21-12-12 | 26-12-12 | 02-01-13 | 1  | D7  | d267 | 19 | 11 | 0 | 8  | 0,58 | 0,00 | 0,42 | 0,42 | non release farm |
| 2013 | 21-12-12 | 26-12-12 | 02-01-13 | 1  | D8  | d268 | 24 | 14 | 0 | 10 | 0,58 | 0,00 | 0,42 | 0,42 | non release farm |
| 2013 | 21-12-12 | 26-12-12 | 02-01-13 | 1  | D9  | d269 | 21 | 12 | 0 | 9  | 0,57 | 0,00 | 0,43 | 0,43 | non release farm |
| 2013 | 21-12-12 | 26-12-12 | 02-01-13 | 1  | D10 | d270 | 17 | 10 | 0 | 7  | 0,59 | 0,00 | 0,41 | 0,41 | non release farm |
| 2013 | 02-01-13 | 07-01-13 | 14-01-13 | 2  | D1  | d271 | 32 | 18 | 0 | 14 | 0,56 | 0,00 | 0,44 | 0,44 | non release farm |
| 2013 | 02-01-13 | 07-01-13 | 14-01-13 | 2  | D2  | d272 | 21 | 11 | 0 | 10 | 0,52 | 0,00 | 0,48 | 0,48 | non release farm |
| 2013 | 02-01-13 | 07-01-13 | 14-01-13 | 2  | D3  | d273 | 33 | 20 | 0 | 13 | 0,61 | 0,00 | 0,39 | 0,39 | non release farm |
| 2013 | 02-01-13 | 07-01-13 | 14-01-13 | 2  | D4  | d274 | 19 | 12 | 0 | 7  | 0,63 | 0,00 | 0,37 | 0,37 | non release farm |
| 2013 | 02-01-13 | 07-01-13 | 14-01-13 | 2  | D5  | d275 | 35 | 18 | 0 | 17 | 0,51 | 0,00 | 0,49 | 0,49 | non release farm |
| 2013 | 02-01-13 | 07-01-13 | 14-01-13 | 2  | D6  | d276 | 11 | 6  | 0 | 5  | 0,55 | 0,00 | 0,45 | 0,45 | non release farm |
| 2013 | 02-01-13 | 07-01-13 | 14-01-13 | 2  | D7  | d277 | 17 | 10 | 0 | 7  | 0,59 | 0,00 | 0,41 | 0,41 | non release farm |
| 2013 | 02-01-13 | 07-01-13 | 14-01-13 | 2  | D8  | d278 | 29 | 16 | 0 | 13 | 0,55 | 0,00 | 0,45 | 0,45 | non release farm |

# Hojal

|      |          |          |          |   |     |      |    |    |   |    |      |      |      |      |                  |
|------|----------|----------|----------|---|-----|------|----|----|---|----|------|------|------|------|------------------|
| 2013 | 02-01-13 | 07-01-13 | 14-01-13 | 2 | D9  | d279 | 18 | 11 | 0 | 7  | 0,61 | 0,00 | 0,39 | 0,39 | non release farm |
| 2013 | 02-01-13 | 07-01-13 | 14-01-13 | 2 | D10 | d280 | 22 | 12 | 0 | 10 | 0,55 | 0,00 | 0,45 | 0,45 | non release farm |
| 2013 | 14-01-13 | 19-01-13 | 26-01-13 | 3 | D1  | d281 | 30 | 17 | 0 | 13 | 0,57 | 0,00 | 0,43 | 0,43 | non release farm |
| 2013 | 14-01-13 | 19-01-13 | 26-01-13 | 3 | D2  | d282 | 26 | 19 | 0 | 7  | 0,73 | 0,00 | 0,27 | 0,27 | non release farm |
| 2013 | 14-01-13 | 19-01-13 | 26-01-13 | 3 | D3  | d283 | 14 | 8  | 0 | 6  | 0,57 | 0,00 | 0,43 | 0,43 | non release farm |
| 2013 | 14-01-13 | 19-01-13 | 26-01-13 | 3 | D4  | d284 | 28 | 15 | 0 | 13 | 0,54 | 0,00 | 0,46 | 0,46 | non release farm |
| 2013 | 14-01-13 | 19-01-13 | 26-01-13 | 3 | D5  | d285 | 10 | 6  | 0 | 4  | 0,60 | 0,00 | 0,40 | 0,40 | non release farm |
| 2013 | 14-01-13 | 19-01-13 | 26-01-13 | 3 | D6  | d286 | 9  | 4  | 0 | 5  | 0,44 | 0,00 | 0,56 | 0,56 | non release farm |
| 2013 | 14-01-13 | 19-01-13 | 26-01-13 | 3 | D7  | d287 | 13 | 7  | 0 | 6  | 0,54 | 0,00 | 0,46 | 0,46 | non release farm |
| 2013 | 14-01-13 | 19-01-13 | 26-01-13 | 3 | D8  | d288 | 18 | 10 | 0 | 8  | 0,56 | 0,00 | 0,44 | 0,44 | non release farm |
| 2013 | 14-01-13 | 19-01-13 | 26-01-13 | 3 | D9  | d289 | 13 | 7  | 0 | 6  | 0,54 | 0,00 | 0,46 | 0,46 | non release farm |
| 2013 | 14-01-13 | 19-01-13 | 26-01-13 | 3 | D10 | d290 | 21 | 12 | 0 | 9  | 0,57 | 0,00 | 0,43 | 0,43 | non release farm |
| 2013 | 26-01-13 | 31-01-13 | 07-02-13 | 4 | D1  | d291 | 26 | 19 | 0 | 7  | 0,73 | 0,00 | 0,27 | 0,27 | non release farm |
| 2013 | 26-01-13 | 31-01-13 | 07-02-13 | 4 | D2  | d292 | 19 | 10 | 0 | 9  | 0,53 | 0,00 | 0,47 | 0,47 | non release farm |
| 2013 | 26-01-13 | 31-01-13 | 07-02-13 | 4 | D3  | d293 | 30 | 19 | 0 | 11 | 0,63 | 0,00 | 0,37 | 0,37 | non release farm |
| 2013 | 26-01-13 | 31-01-13 | 07-02-13 | 4 | D4  | d294 | 13 | 8  | 0 | 5  | 0,62 | 0,00 | 0,38 | 0,38 | non release farm |
| 2013 | 26-01-13 | 31-01-13 | 07-02-13 | 4 | D5  | d295 | 17 | 14 | 0 | 3  | 0,82 | 0,00 | 0,18 | 0,18 | non release farm |
| 2013 | 26-01-13 | 31-01-13 | 07-02-13 | 4 | D6  | d296 | 15 | 11 | 0 | 4  | 0,73 | 0,00 | 0,27 | 0,27 | non release farm |
| 2013 | 26-01-13 | 31-01-13 | 07-02-13 | 4 | D7  | d297 | 18 | 13 | 0 | 5  | 0,72 | 0,00 | 0,28 | 0,28 | non release farm |
| 2013 | 26-01-13 | 31-01-13 | 07-02-13 | 4 | D8  | d298 | 22 | 12 | 0 | 10 | 0,55 | 0,00 | 0,45 | 0,45 | non release farm |
| 2013 | 26-01-13 | 31-01-13 | 07-02-13 | 4 | D9  | d299 | 19 | 11 | 0 | 8  | 0,58 | 0,00 | 0,42 | 0,42 | non release farm |
| 2013 | 26-01-13 | 31-01-13 | 07-02-13 | 4 | D10 | d300 | 24 | 11 | 0 | 13 | 0,46 | 0,00 | 0,54 | 0,54 | non release farm |
| 2013 | 07-02-13 | 12-02-13 | 19-02-13 | 5 | D1  | d301 | 22 | 13 | 0 | 9  | 0,59 | 0,00 | 0,41 | 0,41 | non release farm |
| 2013 | 07-02-13 | 12-02-13 | 19-02-13 | 5 | D2  | d302 | 30 | 18 | 0 | 12 | 0,60 | 0,00 | 0,40 | 0,40 | non release farm |
| 2013 | 07-02-13 | 12-02-13 | 19-02-13 | 5 | D3  | d303 | 27 | 16 | 0 | 11 | 0,59 | 0,00 | 0,41 | 0,41 | non release farm |
| 2013 | 07-02-13 | 12-02-13 | 19-02-13 | 5 | D4  | d304 | 24 | 14 | 0 | 10 | 0,58 | 0,00 | 0,42 | 0,42 | non release farm |
| 2013 | 07-02-13 | 12-02-13 | 19-02-13 | 5 | D5  | d305 | 21 | 13 | 0 | 8  | 0,62 | 0,00 | 0,38 | 0,38 | non release farm |
| 2013 | 07-02-13 | 12-02-13 | 19-02-13 | 5 | D6  | d306 | 25 | 15 | 0 | 10 | 0,60 | 0,00 | 0,40 | 0,40 | non release farm |
| 2013 | 07-02-13 | 12-02-13 | 19-02-13 | 5 | D7  | d307 | 32 | 17 | 0 | 15 | 0,53 | 0,00 | 0,47 | 0,47 | non release farm |
| 2013 | 07-02-13 | 12-02-13 | 19-02-13 | 5 | D8  | d308 | 20 | 12 | 0 | 8  | 0,60 | 0,00 | 0,40 | 0,40 | non release farm |
| 2013 | 07-02-13 | 12-02-13 | 19-02-13 | 5 | D9  | d309 | 24 | 15 | 0 | 9  | 0,63 | 0,00 | 0,38 | 0,38 | non release farm |
| 2013 | 07-02-13 | 12-02-13 | 19-02-13 | 5 | D10 | d310 | 16 | 11 | 0 | 5  | 0,69 | 0,00 | 0,31 | 0,31 | non release farm |
| 2013 | 19-02-13 | 25-02-13 | 04-03-13 | 6 | D1  | d311 | 26 | 15 | 0 | 11 | 0,58 | 0,00 | 0,42 | 0,42 | non release farm |
| 2013 | 19-02-13 | 25-02-13 | 04-03-13 | 6 | D2  | d312 | 30 | 16 | 0 | 14 | 0,53 | 0,00 | 0,47 | 0,47 | non release farm |
| 2013 | 19-02-13 | 25-02-13 | 04-03-13 | 6 | D3  | d313 | 27 | 15 | 0 | 12 | 0,56 | 0,00 | 0,44 | 0,44 | non release farm |
| 2013 | 19-02-13 | 25-02-13 | 04-03-13 | 6 | D4  | d314 | 19 | 12 | 0 | 7  | 0,63 | 0,00 | 0,37 | 0,37 | non release farm |
| 2013 | 19-02-13 | 25-02-13 | 04-03-13 | 6 | D5  | d315 | 21 | 15 | 0 | 6  | 0,71 | 0,00 | 0,29 | 0,29 | non release farm |
| 2013 | 19-02-13 | 25-02-13 | 04-03-13 | 6 | D6  | d316 | 28 | 19 | 0 | 9  | 0,68 | 0,00 | 0,32 | 0,32 | non release farm |
| 2013 | 19-02-13 | 25-02-13 | 04-03-13 | 6 | D7  | d317 | 25 | 13 | 0 | 12 | 0,52 | 0,00 | 0,48 | 0,48 | non release farm |
| 2013 | 19-02-13 | 25-02-13 | 04-03-13 | 6 | D8  | d318 | 37 | 23 | 0 | 14 | 0,62 | 0,00 | 0,38 | 0,38 | non release farm |



# Hojal

|      |          |          |          |    |     |      |    |    |   |    |      |      |      |      |                  |
|------|----------|----------|----------|----|-----|------|----|----|---|----|------|------|------|------|------------------|
| 2013 | 19-02-13 | 25-02-13 | 04-03-13 | 6  | D9  | d319 | 28 | 10 | 0 | 8  | 0,36 | 0,00 | 0,29 | 0,29 | non release farm |
| 2013 | 19-02-13 | 25-02-13 | 04-03-13 | 6  | D10 | d320 | 26 | 15 | 0 | 11 | 0,58 | 0,00 | 0,42 | 0,42 | non release farm |
| 2013 | 04-03-13 | 09-03-13 | 16-03-13 | 7  | D1  | d321 | 37 | 20 | 0 | 17 | 0,54 | 0,00 | 0,46 | 0,46 | non release farm |
| 2013 | 04-03-13 | 09-03-13 | 16-03-13 | 7  | D2  | d322 | 32 | 20 | 0 | 12 | 0,63 | 0,00 | 0,38 | 0,38 | non release farm |
| 2013 | 04-03-13 | 09-03-13 | 16-03-13 | 7  | D3  | d323 | 21 | 14 | 0 | 7  | 0,67 | 0,00 | 0,33 | 0,33 | non release farm |
| 2013 | 04-03-13 | 09-03-13 | 16-03-13 | 7  | D4  | d324 | 31 | 21 | 0 | 10 | 0,68 | 0,00 | 0,32 | 0,32 | non release farm |
| 2013 | 04-03-13 | 09-03-13 | 16-03-13 | 7  | D5  | d325 | 25 | 15 | 0 | 10 | 0,60 | 0,00 | 0,40 | 0,40 | non release farm |
| 2013 | 04-03-13 | 09-03-13 | 16-03-13 | 7  | D6  | d326 | 29 | 18 | 0 | 11 | 0,62 | 0,00 | 0,38 | 0,38 | non release farm |
| 2013 | 04-03-13 | 09-03-13 | 16-03-13 | 7  | D7  | d327 | 28 | 16 | 0 | 12 | 0,57 | 0,00 | 0,43 | 0,43 | non release farm |
| 2013 | 04-03-13 | 09-03-13 | 16-03-13 | 7  | D8  | d328 | 41 | 25 | 0 | 16 | 0,61 | 0,00 | 0,39 | 0,39 | non release farm |
| 2013 | 04-03-13 | 09-03-13 | 16-03-13 | 7  | D9  | d329 | 35 | 23 | 0 | 12 | 0,66 | 0,00 | 0,34 | 0,34 | non release farm |
| 2013 | 04-03-13 | 09-03-13 | 16-03-13 | 7  | D10 | d330 | 26 | 19 | 0 | 7  | 0,73 | 0,00 | 0,27 | 0,27 | non release farm |
| 2013 | 16-03-13 | 21-03-13 | 28-03-13 | 8  | D1  | d331 | 22 | 15 | 0 | 7  | 0,68 | 0,00 | 0,32 | 0,32 | non release farm |
| 2013 | 16-03-13 | 21-03-13 | 28-03-13 | 8  | D2  | d332 | 48 | 30 | 0 | 18 | 0,63 | 0,00 | 0,38 | 0,38 | non release farm |
| 2013 | 16-03-13 | 21-03-13 | 28-03-13 | 8  | D3  | d333 | 23 | 13 | 0 | 10 | 0,57 | 0,00 | 0,43 | 0,43 | non release farm |
| 2013 | 16-03-13 | 21-03-13 | 28-03-13 | 8  | D4  | d334 | 34 | 24 | 0 | 10 | 0,71 | 0,00 | 0,29 | 0,29 | non release farm |
| 2013 | 16-03-13 | 21-03-13 | 28-03-13 | 8  | D5  | d335 | 24 | 13 | 0 | 11 | 0,54 | 0,00 | 0,46 | 0,46 | non release farm |
| 2013 | 16-03-13 | 21-03-13 | 28-03-13 | 8  | D6  | d336 | 25 | 13 | 0 | 12 | 0,52 | 0,00 | 0,48 | 0,48 | non release farm |
| 2013 | 16-03-13 | 21-03-13 | 28-03-13 | 8  | D7  | d337 | 16 | 7  | 0 | 9  | 0,44 | 0,00 | 0,56 | 0,56 | non release farm |
| 2013 | 16-03-13 | 21-03-13 | 28-03-13 | 8  | D8  | d338 | 29 | 21 | 0 | 8  | 0,72 | 0,00 | 0,28 | 0,28 | non release farm |
| 2013 | 16-03-13 | 21-03-13 | 28-03-13 | 8  | D9  | d339 | 26 | 19 | 0 | 7  | 0,73 | 0,00 | 0,27 | 0,27 | non release farm |
| 2013 | 16-03-13 | 21-03-13 | 28-03-13 | 8  | D10 | d340 | 21 | 13 | 0 | 8  | 0,62 | 0,00 | 0,38 | 0,38 | non release farm |
| 2013 | 28-03-13 | 04-04-13 | 11-04-13 | 9  | D1  | d341 | 28 | 16 | 0 | 12 | 0,57 | 0,00 | 0,43 | 0,43 | non release farm |
| 2013 | 28-03-13 | 04-04-13 | 11-04-13 | 9  | D2  | d342 | 17 | 8  | 0 | 9  | 0,47 | 0,00 | 0,53 | 0,53 | non release farm |
| 2013 | 28-03-13 | 04-04-13 | 11-04-13 | 9  | D3  | d343 | 24 | 12 | 0 | 12 | 0,50 | 0,00 | 0,50 | 0,50 | non release farm |
| 2013 | 28-03-13 | 04-04-13 | 11-04-13 | 9  | D4  | d344 | 27 | 14 | 0 | 13 | 0,52 | 0,00 | 0,48 | 0,48 | non release farm |
| 2013 | 28-03-13 | 04-04-13 | 11-04-13 | 9  | D5  | d345 | 35 | 21 | 0 | 14 | 0,60 | 0,00 | 0,40 | 0,40 | non release farm |
| 2013 | 28-03-13 | 04-04-13 | 11-04-13 | 9  | D6  | d346 | 13 | 7  | 0 | 6  | 0,54 | 0,00 | 0,46 | 0,46 | non release farm |
| 2013 | 28-03-13 | 04-04-13 | 11-04-13 | 9  | D7  | d347 | 21 | 11 | 0 | 10 | 0,52 | 0,00 | 0,48 | 0,48 | non release farm |
| 2013 | 28-03-13 | 04-04-13 | 11-04-13 | 9  | D8  | d348 | 32 | 18 | 0 | 14 | 0,56 | 0,00 | 0,44 | 0,44 | non release farm |
| 2013 | 28-03-13 | 04-04-13 | 11-04-13 | 9  | D9  | d349 | 23 | 16 | 0 | 7  | 0,70 | 0,00 | 0,30 | 0,30 | non release farm |
| 2013 | 28-03-13 | 04-04-13 | 11-04-13 | 9  | D10 | d350 | 19 | 13 | 0 | 6  | 0,68 | 0,00 | 0,32 | 0,32 | non release farm |
| 2013 | 11-04-13 | 16-04-13 | 23-04-13 | 10 | D1  | d351 | 20 | 12 | 0 | 8  | 0,60 | 0,00 | 0,40 | 0,40 | non release farm |
| 2013 | 11-04-13 | 16-04-13 | 23-04-13 | 10 | D2  | d352 | 14 | 8  | 0 | 6  | 0,57 | 0,00 | 0,43 | 0,43 | non release farm |
| 2013 | 11-04-13 | 16-04-13 | 23-04-13 | 10 | D3  | d353 | 15 | 7  | 0 | 8  | 0,47 | 0,00 | 0,53 | 0,53 | non release farm |
| 2013 | 11-04-13 | 16-04-13 | 23-04-13 | 10 | D4  | d354 | 23 | 12 | 0 | 11 | 0,52 | 0,00 | 0,48 | 0,48 | non release farm |
| 2013 | 11-04-13 | 16-04-13 | 23-04-13 | 10 | D5  | d355 | 20 | 11 | 0 | 9  | 0,55 | 0,00 | 0,45 | 0,45 | non release farm |
| 2013 | 11-04-13 | 16-04-13 | 23-04-13 | 10 | D6  | d356 | 17 | 9  | 0 | 8  | 0,53 | 0,00 | 0,47 | 0,47 | non release farm |
| 2013 | 11-04-13 | 16-04-13 | 23-04-13 | 10 | D7  | d357 | 13 | 8  | 0 | 5  | 0,62 | 0,00 | 0,38 | 0,38 | non release farm |
| 2013 | 11-04-13 | 16-04-13 | 23-04-13 | 10 | D8  | d358 | 11 | 5  | 0 | 6  | 0,45 | 0,00 | 0,55 | 0,55 | non release farm |

# Hoja1

|      |          |          |          |    |     |      |    |    |   |    |      |      |      |      |                  |
|------|----------|----------|----------|----|-----|------|----|----|---|----|------|------|------|------|------------------|
| 2013 | 11-04-13 | 16-04-13 | 23-04-13 | 10 | D9  | d359 | 13 | 6  | 0 | 7  | 0,46 | 0,00 | 0,54 | 0,54 | non release farm |
| 2013 | 11-04-13 | 16-04-13 | 23-04-13 | 10 | D10 | d360 | 10 | 4  | 0 | 6  | 0,40 | 0,00 | 0,60 | 0,60 | non release farm |
| 2013 | 23-04-13 | 28-04-13 | 05-05-13 | 11 | D1  | d361 | 13 | 7  | 0 | 6  | 0,54 | 0,00 | 0,46 | 0,46 | non release farm |
| 2013 | 23-04-13 | 28-04-13 | 05-05-13 | 11 | D2  | d362 | 9  | 5  | 0 | 4  | 0,56 | 0,00 | 0,44 | 0,44 | non release farm |
| 2013 | 23-04-13 | 28-04-13 | 05-05-13 | 11 | D3  | d363 | 7  | 4  | 0 | 3  | 0,57 | 0,00 | 0,43 | 0,43 | non release farm |
| 2013 | 23-04-13 | 28-04-13 | 05-05-13 | 11 | D4  | d364 | 12 | 5  | 0 | 7  | 0,42 | 0,00 | 0,58 | 0,58 | non release farm |
| 2013 | 23-04-13 | 28-04-13 | 05-05-13 | 11 | D5  | d365 | 16 | 4  | 0 | 12 | 0,25 | 0,00 | 0,75 | 0,75 | non release farm |
| 2013 | 23-04-13 | 28-04-13 | 05-05-13 | 11 | D6  | d366 | 8  | 3  | 0 | 5  | 0,38 | 0,00 | 0,63 | 0,63 | non release farm |
| 2013 | 23-04-13 | 28-04-13 | 05-05-13 | 11 | D7  | d367 | 13 | 8  | 0 | 5  | 0,62 | 0,00 | 0,38 | 0,38 | non release farm |
| 2013 | 23-04-13 | 28-04-13 | 05-05-13 | 11 | D8  | d368 | 14 | 7  | 0 | 7  | 0,50 | 0,00 | 0,50 | 0,50 | non release farm |
| 2013 | 23-04-13 | 28-04-13 | 05-05-13 | 11 | D9  | d369 | 18 | 14 | 0 | 4  | 0,78 | 0,00 | 0,22 | 0,22 | non release farm |
| 2013 | 23-04-13 | 28-04-13 | 05-05-13 | 11 | D10 | d370 | 8  | 3  | 0 | 5  | 0,38 | 0,00 | 0,63 | 0,63 | non release farm |
| 2013 | 05-05-13 | 10-05-13 | 17-05-13 | 12 | D1  | d371 | 10 | 6  | 0 | 4  | 0,60 | 0,00 | 0,40 | 0,40 | non release farm |
| 2013 | 05-05-13 | 10-05-13 | 17-05-13 | 12 | D2  | d372 | 12 | 7  | 0 | 5  | 0,58 | 0,00 | 0,42 | 0,42 | non release farm |
| 2013 | 05-05-13 | 10-05-13 | 17-05-13 | 12 | D3  | d373 | 17 | 12 | 0 | 5  | 0,71 | 0,00 | 0,29 | 0,29 | non release farm |
| 2013 | 05-05-13 | 10-05-13 | 17-05-13 | 12 | D4  | d374 | 14 | 10 | 0 | 4  | 0,71 | 0,00 | 0,29 | 0,29 | non release farm |
| 2013 | 05-05-13 | 10-05-13 | 17-05-13 | 12 | D5  | d375 | 11 | 7  | 0 | 4  | 0,64 | 0,00 | 0,36 | 0,36 | non release farm |
| 2013 | 05-05-13 | 10-05-13 | 17-05-13 | 12 | D6  | d376 | 9  | 3  | 0 | 6  | 0,33 | 0,00 | 0,67 | 0,67 | non release farm |
| 2013 | 05-05-13 | 10-05-13 | 17-05-13 | 12 | D7  | d377 | 15 | 4  | 0 | 11 | 0,27 | 0,00 | 0,73 | 0,73 | non release farm |
| 2013 | 05-05-13 | 10-05-13 | 17-05-13 | 12 | D8  | d378 | 12 | 3  | 0 | 9  | 0,25 | 0,00 | 0,75 | 0,75 | non release farm |
| 2013 | 05-05-13 | 10-05-13 | 17-05-13 | 12 | D9  | d379 | 19 | 7  | 0 | 12 | 0,37 | 0,00 | 0,63 | 0,63 | non release farm |
| 2013 | 05-05-13 | 10-05-13 | 17-05-13 | 12 | D10 | d380 | 21 | 8  | 0 | 13 | 0,38 | 0,00 | 0,62 | 0,62 | non release farm |
| 2013 | 17-05-13 | 23-05-13 | 30-05-13 | 13 | D1  | d381 | 14 | 9  | 0 | 5  | 0,64 | 0,00 | 0,36 | 0,36 | non release farm |
| 2013 | 17-05-13 | 23-05-13 | 30-05-13 | 13 | D2  | d382 | 9  | 5  | 0 | 4  | 0,56 | 0,00 | 0,44 | 0,44 | non release farm |
| 2013 | 17-05-13 | 23-05-13 | 30-05-13 | 13 | D3  | d383 | 12 | 9  | 0 | 3  | 0,75 | 0,00 | 0,25 | 0,25 | non release farm |
| 2013 | 17-05-13 | 23-05-13 | 30-05-13 | 13 | D4  | d384 | 8  | 6  | 0 | 2  | 0,75 | 0,00 | 0,25 | 0,25 | non release farm |
| 2013 | 17-05-13 | 23-05-13 | 30-05-13 | 13 | D5  | d385 | 26 | 17 | 0 | 9  | 0,65 | 0,00 | 0,35 | 0,35 | non release farm |
| 2013 | 17-05-13 | 23-05-13 | 30-05-13 | 13 | D6  | d386 | 11 | 5  | 0 | 6  | 0,45 | 0,00 | 0,55 | 0,55 | non release farm |
| 2013 | 17-05-13 | 23-05-13 | 30-05-13 | 13 | D7  | d387 | 10 | 1  | 0 | 9  | 0,10 | 0,00 | 0,90 | 0,90 | non release farm |
| 2013 | 17-05-13 | 23-05-13 | 30-05-13 | 13 | D8  | d388 | 13 | 8  | 0 | 5  | 0,62 | 0,00 | 0,38 | 0,38 | non release farm |
| 2013 | 17-05-13 | 23-05-13 | 30-05-13 | 13 | D9  | d389 | 18 | 4  | 0 | 14 | 0,22 | 0,00 | 0,78 | 0,78 | non release farm |
| 2013 | 17-05-13 | 23-05-13 | 30-05-13 | 13 | D10 | d390 | 10 | 2  | 0 | 8  | 0,20 | 0,00 | 0,80 | 0,80 | non release farm |
| 2014 | 20-12-13 | 26-12-13 | 02-01-14 | 1  | D1  | d391 | 34 | 23 | 0 | 11 | 0,68 | 0,00 | 0,32 | 0,32 | non release farm |
| 2014 | 20-12-13 | 26-12-13 | 02-01-14 | 1  | D2  | d392 | 21 | 11 | 0 | 10 | 0,52 | 0,00 | 0,48 | 0,48 | non release farm |
| 2014 | 20-12-13 | 26-12-13 | 02-01-14 | 1  | D3  | d393 | 31 | 21 | 0 | 10 | 0,68 | 0,00 | 0,32 | 0,32 | non release farm |
| 2014 | 20-12-13 | 26-12-13 | 02-01-14 | 1  | D4  | d394 | 22 | 13 | 0 | 9  | 0,59 | 0,00 | 0,41 | 0,41 | non release farm |
| 2014 | 20-12-13 | 26-12-13 | 02-01-14 | 1  | D5  | d395 | 24 | 14 | 0 | 10 | 0,58 | 0,00 | 0,42 | 0,42 | non release farm |
| 2014 | 20-12-13 | 26-12-13 | 02-01-14 | 1  | D6  | d396 | 23 | 9  | 0 | 14 | 0,39 | 0,00 | 0,61 | 0,61 | non release farm |
| 2014 | 20-12-13 | 26-12-13 | 02-01-14 | 1  | D7  | d397 | 30 | 15 | 0 | 15 | 0,50 | 0,00 | 0,50 | 0,50 | non release farm |
| 2014 | 20-12-13 | 26-12-13 | 02-01-14 | 1  | D8  | d398 | 20 | 11 | 0 | 9  | 0,55 | 0,00 | 0,45 | 0,45 | non release farm |

# Hoja1

|      |          |          |          |   |     |      |    |    |   |    |      |      |      |      |                  |
|------|----------|----------|----------|---|-----|------|----|----|---|----|------|------|------|------|------------------|
| 2014 | 20-12-13 | 26-12-13 | 02-01-14 | 1 | D9  | d399 | 32 | 19 | 0 | 13 | 0,59 | 0,00 | 0,41 | 0,41 | non release farm |
| 2014 | 20-12-13 | 26-12-13 | 02-01-14 | 1 | D10 | d400 | 26 | 12 | 0 | 14 | 0,46 | 0,00 | 0,54 | 0,54 | non release farm |
| 2014 | 02-01-14 | 07-01-14 | 14-01-14 | 2 | D1  | d401 | 24 | 13 | 0 | 11 | 0,54 | 0,00 | 0,46 | 0,46 | non release farm |
| 2014 | 02-01-14 | 07-01-14 | 14-01-14 | 2 | D2  | d402 | 48 | 29 | 0 | 19 | 0,60 | 0,00 | 0,40 | 0,40 | non release farm |
| 2014 | 02-01-14 | 07-01-14 | 14-01-14 | 2 | D3  | d403 | 21 | 13 | 0 | 8  | 0,62 | 0,00 | 0,38 | 0,38 | non release farm |
| 2014 | 02-01-14 | 07-01-14 | 14-01-14 | 2 | D4  | d404 | 30 | 18 | 0 | 12 | 0,60 | 0,00 | 0,40 | 0,40 | non release farm |
| 2014 | 02-01-14 | 07-01-14 | 14-01-14 | 2 | D5  | d405 | 22 | 13 | 0 | 9  | 0,59 | 0,00 | 0,41 | 0,41 | non release farm |
| 2014 | 02-01-14 | 07-01-14 | 14-01-14 | 2 | D6  | d406 | 20 | 14 | 0 | 6  | 0,70 | 0,00 | 0,30 | 0,30 | non release farm |
| 2014 | 02-01-14 | 07-01-14 | 14-01-14 | 2 | D7  | d407 | 25 | 15 | 0 | 10 | 0,60 | 0,00 | 0,40 | 0,40 | non release farm |
| 2014 | 02-01-14 | 07-01-14 | 14-01-14 | 2 | D8  | d408 | 14 | 9  | 0 | 5  | 0,64 | 0,00 | 0,36 | 0,36 | non release farm |
| 2014 | 02-01-14 | 07-01-14 | 14-01-14 | 2 | D9  | d409 | 22 | 15 | 0 | 7  | 0,68 | 0,00 | 0,32 | 0,32 | non release farm |
| 2014 | 02-01-14 | 07-01-14 | 14-01-14 | 2 | D10 | d410 | 16 | 10 | 0 | 6  | 0,63 | 0,00 | 0,38 | 0,38 | non release farm |
| 2014 | 14-01-14 | 19-01-14 | 26-01-14 | 3 | D1  | d411 | 26 | 16 | 0 | 10 | 0,62 | 0,00 | 0,38 | 0,38 | non release farm |
| 2014 | 14-01-14 | 19-01-14 | 26-01-14 | 3 | D2  | d412 | 18 | 10 | 0 | 8  | 0,56 | 0,00 | 0,44 | 0,44 | non release farm |
| 2014 | 14-01-14 | 19-01-14 | 26-01-14 | 3 | D3  | d413 | 41 | 27 | 0 | 14 | 0,66 | 0,00 | 0,34 | 0,34 | non release farm |
| 2014 | 14-01-14 | 19-01-14 | 26-01-14 | 3 | D4  | d414 | 24 | 16 | 0 | 8  | 0,67 | 0,00 | 0,33 | 0,33 | non release farm |
| 2014 | 14-01-14 | 19-01-14 | 26-01-14 | 3 | D5  | d415 | 32 | 19 | 0 | 13 | 0,59 | 0,00 | 0,41 | 0,41 | non release farm |
| 2014 | 14-01-14 | 19-01-14 | 26-01-14 | 3 | D6  | d416 | 19 | 12 | 0 | 7  | 0,63 | 0,00 | 0,37 | 0,37 | non release farm |
| 2014 | 14-01-14 | 19-01-14 | 26-01-14 | 3 | D7  | d417 | 24 | 11 | 0 | 13 | 0,46 | 0,00 | 0,54 | 0,54 | non release farm |
| 2014 | 14-01-14 | 19-01-14 | 26-01-14 | 3 | D8  | d418 | 20 | 13 | 0 | 7  | 0,65 | 0,00 | 0,35 | 0,35 | non release farm |
| 2014 | 14-01-14 | 19-01-14 | 26-01-14 | 3 | D9  | d419 | 18 | 10 | 0 | 8  | 0,56 | 0,00 | 0,44 | 0,44 | non release farm |
| 2014 | 14-01-14 | 19-01-14 | 26-01-14 | 3 | D10 | d420 | 28 | 17 | 0 | 11 | 0,61 | 0,00 | 0,39 | 0,39 | non release farm |
| 2014 | 26-01-14 | 31-01-14 | 07-02-14 | 4 | D1  | d421 | 32 | 20 | 0 | 12 | 0,63 | 0,00 | 0,38 | 0,38 | non release farm |
| 2014 | 26-01-14 | 31-01-14 | 07-02-14 | 4 | D2  | d422 | 41 | 26 | 0 | 15 | 0,63 | 0,00 | 0,37 | 0,37 | non release farm |
| 2014 | 26-01-14 | 31-01-14 | 07-02-14 | 4 | D3  | d423 | 25 | 17 | 0 | 8  | 0,68 | 0,00 | 0,32 | 0,32 | non release farm |
| 2014 | 26-01-14 | 31-01-14 | 07-02-14 | 4 | D4  | d424 | 32 | 17 | 0 | 15 | 0,53 | 0,00 | 0,47 | 0,47 | non release farm |
| 2014 | 26-01-14 | 31-01-14 | 07-02-14 | 4 | D5  | d425 | 22 | 10 | 0 | 12 | 0,45 | 0,00 | 0,55 | 0,55 | non release farm |
| 2014 | 26-01-14 | 31-01-14 | 07-02-14 | 4 | D6  | d426 | 27 | 16 | 0 | 11 | 0,59 | 0,00 | 0,41 | 0,41 | non release farm |
| 2014 | 26-01-14 | 31-01-14 | 07-02-14 | 4 | D7  | d427 | 22 | 13 | 0 | 9  | 0,59 | 0,00 | 0,41 | 0,41 | non release farm |
| 2014 | 26-01-14 | 31-01-14 | 07-02-14 | 4 | D8  | d428 | 16 | 9  | 0 | 7  | 0,56 | 0,00 | 0,44 | 0,44 | non release farm |
| 2014 | 26-01-14 | 31-01-14 | 07-02-14 | 4 | D9  | d429 | 24 | 15 | 0 | 9  | 0,63 | 0,00 | 0,38 | 0,38 | non release farm |
| 2014 | 26-01-14 | 31-01-14 | 07-02-14 | 4 | D10 | d430 | 30 | 13 | 0 | 17 | 0,43 | 0,00 | 0,57 | 0,57 | non release farm |
| 2014 | 26-01-14 | 31-01-14 | 07-02-14 | 5 | D1  | d431 | 12 | 7  | 0 | 5  | 0,58 | 0,00 | 0,42 | 0,42 | non release farm |
| 2014 | 26-01-14 | 31-01-14 | 07-02-14 | 5 | D2  | d432 | 21 | 12 | 0 | 9  | 0,57 | 0,00 | 0,43 | 0,43 | non release farm |
| 2014 | 26-01-14 | 31-01-14 | 07-02-14 | 5 | D3  | d433 | 14 | 6  | 0 | 8  | 0,43 | 0,00 | 0,57 | 0,57 | non release farm |
| 2014 | 26-01-14 | 31-01-14 | 07-02-14 | 5 | D4  | d434 | 32 | 18 | 0 | 14 | 0,56 | 0,00 | 0,44 | 0,44 | non release farm |
| 2014 | 26-01-14 | 31-01-14 | 07-02-14 | 5 | D5  | d435 | 26 | 15 | 0 | 11 | 0,58 | 0,00 | 0,42 | 0,42 | non release farm |
| 2014 | 26-01-14 | 31-01-14 | 07-02-14 | 5 | D6  | d436 | 17 | 9  | 0 | 8  | 0,53 | 0,00 | 0,47 | 0,47 | non release farm |
| 2014 | 26-01-14 | 31-01-14 | 07-02-14 | 5 | D7  | d437 | 27 | 14 | 0 | 10 | 0,52 | 0,00 | 0,37 | 0,37 | non release farm |
| 2014 | 26-01-14 | 31-01-14 | 07-02-14 | 5 | D8  | d438 | 16 | 8  | 0 | 8  | 0,50 | 0,00 | 0,50 | 0,50 | non release farm |

# Hoja1

|      |          |          |          |   |     |      |    |    |   |    |      |      |      |      |                  |
|------|----------|----------|----------|---|-----|------|----|----|---|----|------|------|------|------|------------------|
| 2014 | 26-01-14 | 31-01-14 | 07-02-14 | 5 | D9  | d439 | 24 | 14 | 0 | 10 | 0,58 | 0,00 | 0,42 | 0,42 | non release farm |
| 2014 | 26-01-14 | 31-01-14 | 07-02-14 | 5 | D10 | d440 | 21 | 12 | 0 | 9  | 0,57 | 0,00 | 0,43 | 0,43 | non release farm |
| 2014 | 19-02-14 | 25-02-14 | 04-03-14 | 6 | D1  | d441 | 14 | 8  | 0 | 6  | 0,57 | 0,00 | 0,43 | 0,43 | non release farm |
| 2014 | 19-02-14 | 25-02-14 | 04-03-14 | 6 | D2  | d442 | 22 | 14 | 0 | 8  | 0,64 | 0,00 | 0,36 | 0,36 | non release farm |
| 2014 | 19-02-14 | 25-02-14 | 04-03-14 | 6 | D3  | d443 | 19 | 13 | 0 | 6  | 0,68 | 0,00 | 0,32 | 0,32 | non release farm |
| 2014 | 19-02-14 | 25-02-14 | 04-03-14 | 6 | D4  | d444 | 28 | 16 | 0 | 12 | 0,57 | 0,00 | 0,43 | 0,43 | non release farm |
| 2014 | 19-02-14 | 25-02-14 | 04-03-14 | 6 | D5  | d445 | 16 | 6  | 0 | 10 | 0,38 | 0,00 | 0,63 | 0,63 | non release farm |
| 2014 | 19-02-14 | 25-02-14 | 04-03-14 | 6 | D6  | d446 | 36 | 23 | 0 | 13 | 0,64 | 0,00 | 0,36 | 0,36 | non release farm |
| 2014 | 19-02-14 | 25-02-14 | 04-03-14 | 6 | D7  | d447 | 24 | 14 | 0 | 10 | 0,58 | 0,00 | 0,42 | 0,42 | non release farm |
| 2014 | 19-02-14 | 25-02-14 | 04-03-14 | 6 | D8  | d448 | 27 | 20 | 0 | 7  | 0,74 | 0,00 | 0,26 | 0,26 | non release farm |
| 2014 | 19-02-14 | 25-02-14 | 04-03-14 | 6 | D9  | d449 | 26 | 17 | 0 | 9  | 0,65 | 0,00 | 0,35 | 0,35 | non release farm |
| 2014 | 19-02-14 | 25-02-14 | 04-03-14 | 6 | D10 | d450 | 24 | 18 | 0 | 6  | 0,75 | 0,00 | 0,25 | 0,25 | non release farm |
| 2014 | 04-03-14 | 09-03-14 | 16-03-14 | 7 | D1  | d451 | 23 | 13 | 0 | 10 | 0,57 | 0,00 | 0,43 | 0,43 | non release farm |
| 2014 | 04-03-14 | 09-03-14 | 16-03-14 | 7 | D2  | d452 | 21 | 15 | 0 | 6  | 0,71 | 0,00 | 0,29 | 0,29 | non release farm |
| 2014 | 04-03-14 | 09-03-14 | 16-03-14 | 7 | D3  | d453 | 19 | 14 | 0 | 5  | 0,74 | 0,00 | 0,26 | 0,26 | non release farm |
| 2014 | 04-03-14 | 09-03-14 | 16-03-14 | 7 | D4  | d454 | 20 | 10 | 0 | 10 | 0,50 | 0,00 | 0,50 | 0,50 | non release farm |
| 2014 | 04-03-14 | 09-03-14 | 16-03-14 | 7 | D5  | d455 | 16 | 9  | 0 | 7  | 0,56 | 0,00 | 0,44 | 0,44 | non release farm |
| 2014 | 04-03-14 | 09-03-14 | 16-03-14 | 7 | D6  | d456 | 25 | 12 | 0 | 13 | 0,48 | 0,00 | 0,52 | 0,52 | non release farm |
| 2014 | 04-03-14 | 09-03-14 | 16-03-14 | 7 | D7  | d457 | 22 | 10 | 0 | 12 | 0,45 | 0,00 | 0,55 | 0,55 | non release farm |
| 2014 | 04-03-14 | 09-03-14 | 16-03-14 | 7 | D8  | d458 | 16 | 10 | 0 | 6  | 0,63 | 0,00 | 0,38 | 0,38 | non release farm |
| 2014 | 04-03-14 | 09-03-14 | 16-03-14 | 7 | D9  | d459 | 28 | 11 | 0 | 17 | 0,39 | 0,00 | 0,61 | 0,61 | non release farm |
| 2014 | 04-03-14 | 09-03-14 | 16-03-14 | 7 | D10 | d460 | 14 | 9  | 0 | 5  | 0,64 | 0,00 | 0,36 | 0,36 | non release farm |
| 2014 | 16-03-14 | 21-03-14 | 28-03-14 | 8 | D1  | d461 | 30 | 21 | 0 | 9  | 0,70 | 0,00 | 0,30 | 0,30 | non release farm |
| 2014 | 16-03-14 | 21-03-14 | 28-03-14 | 8 | D2  | d462 | 29 | 22 | 0 | 7  | 0,76 | 0,00 | 0,24 | 0,24 | non release farm |
| 2014 | 16-03-14 | 21-03-14 | 28-03-14 | 8 | D3  | d463 | 19 | 11 | 0 | 6  | 0,58 | 0,00 | 0,32 | 0,32 | non release farm |
| 2014 | 16-03-14 | 21-03-14 | 28-03-14 | 8 | D4  | d464 | 21 | 16 | 0 | 5  | 0,76 | 0,00 | 0,24 | 0,24 | non release farm |
| 2014 | 16-03-14 | 21-03-14 | 28-03-14 | 8 | D5  | d465 | 31 | 21 | 0 | 10 | 0,68 | 0,00 | 0,32 | 0,32 | non release farm |
| 2014 | 16-03-14 | 21-03-14 | 28-03-14 | 8 | D6  | d466 | 22 | 17 | 0 | 5  | 0,77 | 0,00 | 0,23 | 0,23 | non release farm |
| 2014 | 16-03-14 | 21-03-14 | 28-03-14 | 8 | D7  | d467 | 18 | 11 | 0 | 7  | 0,61 | 0,00 | 0,39 | 0,39 | non release farm |
| 2014 | 16-03-14 | 21-03-14 | 28-03-14 | 8 | D8  | d468 | 20 | 12 | 0 | 8  | 0,60 | 0,00 | 0,40 | 0,40 | non release farm |
| 2014 | 16-03-14 | 21-03-14 | 28-03-14 | 8 | D9  | d469 | 14 | 7  | 0 | 7  | 0,50 | 0,00 | 0,50 | 0,50 | non release farm |
| 2014 | 16-03-14 | 21-03-14 | 28-03-14 | 8 | D10 | d470 | 22 | 14 | 0 | 8  | 0,64 | 0,00 | 0,36 | 0,36 | non release farm |
| 2014 | 28-03-14 | 04-04-14 | 11-04-14 | 9 | D1  | d471 | 32 | 21 | 0 | 11 | 0,66 | 0,00 | 0,34 | 0,34 | non release farm |
| 2014 | 28-03-14 | 04-04-14 | 11-04-14 | 9 | D2  | d472 | 21 | 12 | 0 | 9  | 0,57 | 0,00 | 0,43 | 0,43 | non release farm |
| 2014 | 28-03-14 | 04-04-14 | 11-04-14 | 9 | D3  | d473 | 19 | 13 | 0 | 6  | 0,68 | 0,00 | 0,32 | 0,32 | non release farm |
| 2014 | 28-03-14 | 04-04-14 | 11-04-14 | 9 | D4  | d474 | 29 | 18 | 0 | 11 | 0,62 | 0,00 | 0,38 | 0,38 | non release farm |
| 2014 | 28-03-14 | 04-04-14 | 11-04-14 | 9 | D5  | d475 | 24 | 17 | 0 | 7  | 0,71 | 0,00 | 0,29 | 0,29 | non release farm |
| 2014 | 28-03-14 | 04-04-14 | 11-04-14 | 9 | D6  | d476 | 44 | 26 | 0 | 18 | 0,59 | 0,00 | 0,41 | 0,41 | non release farm |
| 2014 | 28-03-14 | 04-04-14 | 11-04-14 | 9 | D7  | d477 | 18 | 9  | 0 | 9  | 0,50 | 0,00 | 0,50 | 0,50 | non release farm |
| 2014 | 28-03-14 | 04-04-14 | 11-04-14 | 9 | D8  | d478 | 22 | 14 | 0 | 8  | 0,64 | 0,00 | 0,36 | 0,36 | non release farm |

# Hoja1

|      |          |          |          |    |     |      |    |    |   |    |      |      |      |      |                  |
|------|----------|----------|----------|----|-----|------|----|----|---|----|------|------|------|------|------------------|
| 2014 | 28-03-14 | 04-04-14 | 11-04-14 | 9  | D9  | d479 | 17 | 12 | 0 | 5  | 0,71 | 0,00 | 0,29 | 0,29 | non release farm |
| 2014 | 28-03-14 | 04-04-14 | 11-04-14 | 9  | D10 | d480 | 14 | 9  | 0 | 5  | 0,64 | 0,00 | 0,36 | 0,36 | non release farm |
| 2014 | 11-04-14 | 16-04-14 | 23-04-14 | 10 | D1  | d481 | 12 | 8  | 0 | 4  | 0,67 | 0,00 | 0,33 | 0,33 | non release farm |
| 2014 | 11-04-14 | 16-04-14 | 23-04-14 | 10 | D2  | d482 | 20 | 11 | 0 | 9  | 0,55 | 0,00 | 0,45 | 0,45 | non release farm |
| 2014 | 11-04-14 | 16-04-14 | 23-04-14 | 10 | D3  | d483 | 24 | 7  | 0 | 17 | 0,29 | 0,00 | 0,71 | 0,71 | non release farm |
| 2014 | 11-04-14 | 16-04-14 | 23-04-14 | 10 | D4  | d484 | 18 | 12 | 0 | 6  | 0,67 | 0,00 | 0,33 | 0,33 | non release farm |
| 2014 | 11-04-14 | 16-04-14 | 23-04-14 | 10 | D5  | d485 | 16 | 9  | 0 | 7  | 0,56 | 0,00 | 0,44 | 0,44 | non release farm |
| 2014 | 11-04-14 | 16-04-14 | 23-04-14 | 10 | D6  | d486 | 21 | 15 | 0 | 6  | 0,71 | 0,00 | 0,29 | 0,29 | non release farm |
| 2014 | 11-04-14 | 16-04-14 | 23-04-14 | 10 | D7  | d487 | 34 | 14 | 0 | 20 | 0,41 | 0,00 | 0,59 | 0,59 | non release farm |
| 2014 | 11-04-14 | 16-04-14 | 23-04-14 | 10 | D8  | d488 | 22 | 14 | 0 | 8  | 0,64 | 0,00 | 0,36 | 0,36 | non release farm |
| 2014 | 11-04-14 | 16-04-14 | 23-04-14 | 10 | D9  | d489 | 19 | 6  | 0 | 13 | 0,32 | 0,00 | 0,68 | 0,68 | non release farm |
| 2014 | 11-04-14 | 16-04-14 | 23-04-14 | 10 | D10 | d490 | 28 | 21 | 0 | 7  | 0,75 | 0,00 | 0,25 | 0,25 | non release farm |
| 2014 | 23-04-14 | 28-04-14 | 05-05-14 | 11 | D1  | d491 | 16 | 11 | 0 | 5  | 0,69 | 0,00 | 0,31 | 0,31 | non release farm |
| 2014 | 23-04-14 | 28-04-14 | 05-05-14 | 11 | D2  | d492 | 21 | 14 | 0 | 7  | 0,67 | 0,00 | 0,33 | 0,33 | non release farm |
| 2014 | 23-04-14 | 28-04-14 | 05-05-14 | 11 | D3  | d493 | 17 | 6  | 0 | 11 | 0,35 | 0,00 | 0,65 | 0,65 | non release farm |
| 2014 | 23-04-14 | 28-04-14 | 05-05-14 | 11 | D4  | d494 | 14 | 10 | 0 | 4  | 0,71 | 0,00 | 0,29 | 0,29 | non release farm |
| 2014 | 23-04-14 | 28-04-14 | 05-05-14 | 11 | D5  | d495 | 12 | 8  | 0 | 4  | 0,67 | 0,00 | 0,33 | 0,33 | non release farm |
| 2014 | 23-04-14 | 28-04-14 | 05-05-14 | 11 | D6  | d496 | 21 | 14 | 0 | 7  | 0,67 | 0,00 | 0,33 | 0,33 | non release farm |
| 2014 | 23-04-14 | 28-04-14 | 05-05-14 | 11 | D7  | d497 | 14 | 4  | 0 | 10 | 0,29 | 0,00 | 0,71 | 0,71 | non release farm |
| 2014 | 23-04-14 | 28-04-14 | 05-05-14 | 11 | D8  | d498 | 12 | 4  | 0 | 8  | 0,33 | 0,00 | 0,67 | 0,67 | non release farm |
| 2014 | 23-04-14 | 28-04-14 | 05-05-14 | 11 | D9  | d499 | 20 | 14 | 0 | 6  | 0,70 | 0,00 | 0,30 | 0,30 | non release farm |
| 2014 | 23-04-14 | 28-04-14 | 05-05-14 | 11 | D10 | d500 | 22 | 5  | 0 | 17 | 0,23 | 0,00 | 0,77 | 0,77 | non release farm |
| 2014 | 05-05-14 | 10-05-14 | 17-05-14 | 12 | D1  | d501 | 21 | 13 | 0 | 8  | 0,62 | 0,00 | 0,38 | 0,38 | non release farm |
| 2014 | 05-05-14 | 10-05-14 | 17-05-14 | 12 | D2  | d502 | 20 | 11 | 0 | 9  | 0,55 | 0,00 | 0,45 | 0,45 | non release farm |
| 2014 | 05-05-14 | 10-05-14 | 17-05-14 | 12 | D3  | d503 | 16 | 9  | 0 | 7  | 0,56 | 0,00 | 0,44 | 0,44 | non release farm |
| 2014 | 05-05-14 | 10-05-14 | 17-05-14 | 12 | D4  | d504 | 12 | 7  | 0 | 5  | 0,58 | 0,00 | 0,42 | 0,42 | non release farm |
| 2014 | 05-05-14 | 10-05-14 | 17-05-14 | 12 | D5  | d505 | 14 | 7  | 0 | 7  | 0,50 | 0,00 | 0,50 | 0,50 | non release farm |
| 2014 | 05-05-14 | 10-05-14 | 17-05-14 | 12 | D6  | d506 | 28 | 16 | 0 | 12 | 0,57 | 0,00 | 0,43 | 0,43 | non release farm |
| 2014 | 05-05-14 | 10-05-14 | 17-05-14 | 12 | D7  | d507 | 12 | 1  | 0 | 11 | 0,08 | 0,00 | 0,92 | 0,92 | non release farm |
| 2014 | 05-05-14 | 10-05-14 | 17-05-14 | 12 | D8  | d508 | 10 | 3  | 0 | 7  | 0,30 | 0,00 | 0,70 | 0,70 | non release farm |
| 2014 | 05-05-14 | 10-05-14 | 17-05-14 | 12 | D9  | d509 | 14 | 9  | 0 | 5  | 0,64 | 0,00 | 0,36 | 0,36 | non release farm |
| 2014 | 05-05-14 | 10-05-14 | 17-05-14 | 12 | D10 | d510 | 16 | 10 | 0 | 6  | 0,63 | 0,00 | 0,38 | 0,38 | non release farm |
| 2014 | 17-05-14 | 23-05-14 | 30-05-14 | 13 | D1  | d511 | 20 | 11 | 0 | 9  | 0,55 | 0,00 | 0,45 | 0,45 | non release farm |
| 2014 | 17-05-14 | 23-05-14 | 30-05-14 | 13 | D2  | d512 | 18 | 7  | 0 | 11 | 0,39 | 0,00 | 0,61 | 0,61 | non release farm |
| 2014 | 17-05-14 | 23-05-14 | 30-05-14 | 13 | D3  | d513 | 14 | 5  | 0 | 9  | 0,36 | 0,00 | 0,64 | 0,64 | non release farm |
| 2014 | 17-05-14 | 23-05-14 | 30-05-14 | 13 | D4  | d514 | 11 | 5  | 0 | 6  | 0,45 | 0,00 | 0,55 | 0,55 | non release farm |
| 2014 | 17-05-14 | 23-05-14 | 30-05-14 | 13 | D5  | d515 | 17 | 12 | 0 | 5  | 0,71 | 0,00 | 0,29 | 0,29 | non release farm |
| 2014 | 17-05-14 | 23-05-14 | 30-05-14 | 13 | D6  | d516 | 14 | 11 | 0 | 3  | 0,79 | 0,00 | 0,21 | 0,21 | non release farm |
| 2014 | 17-05-14 | 23-05-14 | 30-05-14 | 13 | D7  | d517 | 12 | 4  | 0 | 8  | 0,33 | 0,00 | 0,67 | 0,67 | non release farm |
| 2014 | 17-05-14 | 23-05-14 | 30-05-14 | 13 | D8  | d518 | 16 | 10 | 0 | 6  | 0,63 | 0,00 | 0,38 | 0,38 | non release farm |

# Hoja1

|      |          |          |          |    |     |      |    |   |   |    |      |      |      |      |                  |
|------|----------|----------|----------|----|-----|------|----|---|---|----|------|------|------|------|------------------|
| 2014 | 17-05-14 | 23-05-14 | 30-05-14 | 13 | D9  | d519 | 19 | 6 | 0 | 13 | 0,32 | 0,00 | 0,68 | 0,68 | non release farm |
| 2014 | 17-05-14 | 23-05-14 | 30-05-14 | 13 | D10 | d520 | 14 | 4 | 0 | 10 | 0,29 | 0,00 | 0,71 | 0,71 | non release farm |
