# Supplementary material for: Medfly Population Suppression through Augmentative Release of an Introduced Parasitoid in an Irrigated Multi-Fruit Orchard of Central–Western Argentina
Source: MDPI journal article supplement (doi:10.3390/insects14040387), 2023-04-16
Supplement: s1 [file s1]

xmedfly

| season | treatment        | idrelease | idtrial | pupaC.<br>mean | adultC.<br>.mean | adult<br>D.mean | nopupa<br>C.mean | emerg<br>C.mean | emerg<br>D.mean | pupa<br>C.sd | adult<br>C.sd | adult<br>D.sd | nopupa<br>C.sd | emerg<br>C.sd | emerg<br>D.sd | pupaC.<br>median | adultC.<br>median | adultD.<br>median | nopupaC<br>.median | emergC.<br>median | emergD.<br>median | ftd.<br>mean | femrelease.<br>mean | xtemp.<br>mean | xhr.<br>mean | xprec.<br>mean | prec.<br>acum |
|--------|------------------|-----------|---------|----------------|------------------|-----------------|------------------|-----------------|-----------------|--------------|---------------|---------------|----------------|---------------|---------------|------------------|-------------------|-------------------|--------------------|-------------------|-------------------|--------------|---------------------|----------------|--------------|----------------|---------------|
| 2013   | non release farm | 1         | 1       | 20,10          | 12,40            | 0,00            | 7,70             | 0,62            | 0,00            | 4,72         | 3,17          | 0,00          | 2,58           | 0,07          | 0,00          | 20,50            | 12,00             | 0,00              | 7,50               | 0,59              | 0,00              | 1,00         | 0,00                | 25,89          | 37,92        | 0,75           | 10,00         |
| 2013   | non release farm | 2         | 2       | 23,70          | 13,40            | 0,00            | 10,30            | 0,57            | 0,00            | 8,04         | 4,40          | 0,00          | 3,86           | 0,04          | 0,00          | 21,50            | 12,00             | 0,00              | 10,00              | 0,56              | 0,00              | 1,19         | 0,00                | 27,99          | 46,79        | 0,35           | 4,00          |
| 2013   | non release farm | 3         | 3       | 18,20          | 10,50            | 0,00            | 7,70             | 0,57            | 0,00            | 7,66         | 5,06          | 0,00          | 3,13           | 0,07          | 0,00          | 16,00            | 9,00              | 0,00              | 6,50               | 0,56              | 0,00              | 1,08         | 0,00                | 25,79          | 62,83        | 3,85           | 46,00         |
| 2013   | non release farm | 4         | 4       | 20,30          | 12,80            | 0,00            | 7,50             | 0,64            | 0,00            | 5,21         | 3,65          | 0,00          | 3,27           | 0,11          | 0,00          | 19,00            | 11,50             | 0,00              | 7,50               | 0,62              | 0,00              | 1,15         | 0,00                | 27,13          | 51,58        | 0,00           | 0,50          |
| 2013   | non release farm | 5         | 5       | 24,10          | 14,40            | 0,00            | 9,70             | 0,60            | 0,00            | 4,75         | 2,22          | 0,00          | 2,67           | 0,04          | 0,00          | 24,00            | 14,50             | 0,00              | 9,50               | 0,60              | 0,00              | 1,06         | 0,00                | 26,76          | 47,92        | 1,50           | 16,00         |
| 2013   | non release farm | 6         | 6       | 26,70          | 15,30            | 0,00            | 10,40            | 0,58            | 0,00            | 4,90         | 3,62          | 0,00          | 2,80           | 0,10          | 0,00          | 26,50            | 15,00             | 0,00              | 11,00              | 0,58              | 0,00              | 1,00         | 0,00                | 23,75          | 47,46        | 1,23           | 16,00         |
| 2013   | non release farm | 7         | 7       | 30,50          | 19,10            | 0,00            | 11,40            | 0,63            | 0,00            | 6,00         | 3,48          | 0,00          | 3,27           | 0,06          | 0,00          | 30,00            | 19,50             | 0,00              | 11,50              | 0,62              | 0,00              | 1,17         | 0,00                | 20,98          | 55,17        | 0,03           | 1,00          |
| 2013   | non release farm | 8         | 8       | 26,80          | 16,80            | 0,00            | 10,00            | 0,62            | 0,00            | 8,85         | 6,71          | 0,00          | 3,27           | 0,10          | 0,00          | 24,50            | 14,00             | 0,00              | 9,50               | 0,62              | 0,00              | 0,92         | 0,00                | 20,10          | 56,45        | 0,45           | 5,00          |
| 2013   | non release farm | 9         | 9       | 23,90          | 13,60            | 0,00            | 10,30            | 0,57            | 0,00            | 6,79         | 4,35          | 0,00          | 3,16           | 0,07          | 0,00          | 23,50            | 13,50             | 0,00              | 11,00              | 0,55              | 0,00              | 1,00         | 0,00                | 18,64          | 57,85        | 0,07           | 0,50          |
| 2013   | non release farm | 10        | 10      | 15,60          | 8,20             | 0,00            | 7,40             | 0,52            | 0,00            | 4,27         | 2,82          | 0,00          | 1,78           | 0,07          | 0,00          | 14,50            | 8,00              | 0,00              | 7,50               | 0,53              | 0,00              | 0,85         | 0,00                | 20,00          | 57,35        | 0,08           | 1,00          |
| 2013   | non release farm | 11        | 11      | 11,80          | 6,00             | 0,00            | 5,80             | 0,50            | 0,00            | 3,71         | 3,30          | 0,00          | 2,53           | 0,15          | 0,00          | 12,50            | 5,00              | 0,00              | 5,00               | 0,52              | 0,00              | 0,96         | 0,00                | 18,00          | 65,00        | 0,05           | 1,00          |
| 2013   | non release farm | 12        | 12      | 14,00          | 6,70             | 0,00            | 7,30             | 0,48            | 0,00            | 3,97         | 2,91          | 0,00          | 3,59           | 0,18          | 0,00          | 13,00            | 7,00              | 0,00              | 5,50               | 0,48              | 0,00              | 0,81         | 0,00                | 16,00          | 61,00        | 0,08           | 1,00          |
| 2013   | non release farm | 13        | 13      | 13,10          | 6,60             | 0,00            | 6,50             | 0,49            | 0,00            | 5,36         | 4,55          | 0,00          | 3,57           | 0,24          | 0,00          | 11,50            | 5,50              | 0,00              | 5,50               | 0,59              | 0,00              | 0,47         | 0,00                | 14,00          | 62,00        | 0,07           | 1,00          |
| 2013   | release farm     | 1         | 1       | 22,80          | 9,60             | 2,90            | 10,30            | 0,42            | 0,14            | 5,96         | 2,80          | 0,99          | 3,92           | 0,06          | 0,06          | 23,00            | 8,50              | 3,00              | 9,50               | 0,43              | 0,13              | 1,10         | 8.400,00            | 26,11          | 37,92        | 0,75           | 9,00          |
| 2013   | release farm     | 2         | 2       | 19,90          | 8,50             | 2,40            | 9,00             | 0,42            | 0,13            | 5,69         | 2,95          | 1,35          | 2,83           | 0,09          | 0,08          | 20,50            | 10,00             | 2,50              | 8,00               | 0,41              | 0,13              | 1,07         | 8.520,00            | 27,99          | 46,79        | 0,35           | 4,20          |
| 2013   | release farm     | 3         | 3       | 21,60          | 7,70             | 3,00            | 10,90            | 0,34            | 0,15            | 5,74         | 3,16          | 1,15          | 2,77           | 0,08          | 0,09          | 22,00            | 8,00              | 3,00              | 12,00              | 0,37              | 0,12              | 1,11         | 8.700,00            | 25,79          | 62,83        | 3,85           | 46,20         |
| 2013   | release farm     | 4         | 4       | 22,20          | 6,70             | 3,80            | 11,30            | 0,29            | 0,19            | 6,66         | 3,16          | 2,10          | 4,52           | 0,08          | 0,11          | 22,00            | 7,00              | 3,50              | 10,50              | 0,29              | 0,19              | 0,96         | 9.000,00            | 27,13          | 51,58        | 0,00           | 0,00          |
| 2013   | release farm     | 5         | 5       | 23,60          | 5,10             | 2,30            | 16,20            | 0,21            | 0,10            | 7,78         | 2,96          | 1,34          | 5,92           | 0,10          | 0,05          | 24,00            | 4,50              | 2,50              | 14,50              | 0,20              | 0,09              | 0,73         | 9.450,00            | 26,76          | 47,92        | 1,50           | 18,00         |
| 2013   | release farm     | 6         | 6       | 22,10          | 7,00             | 6,00            | 9,20             | 0,31            | 0,27            | 4,98         | 2,31          | 2,40          | 2,30           | 0,06          | 0,08          | 21,50            | 6,50              | 6,00              | 9,00               | 0,32              | 0,28              | 0,92         | 8.970,00            | 23,75          | 47,46        | 1,23           | 16,00         |
| 2013   | release farm     | 7         | 7       | 17,50          | 4,90             | 3,10            | 9,70             | 0,27            | 0,18            | 7,14         | 3,21          | 1,45          | 3,53           | 0,12          | 0,06          | 18,00            | 4,00              | 3,00              | 8,50               | 0,29              | 0,17              | 0,79         | 9.300,00            | 20,98          | 55,17        | 0,03           | 0,30          |
| 2013   | release farm     | 8         | 8       | 15,80          | 3,20             | 3,00            | 9,60             | 0,17            | 0,19            | 5,67         | 3,16          | 1,33          | 3,13           | 0,15          | 0,08          | 14,00            | 3,00              | 3,00              | 10,50              | 0,22              | 0,17              | 0,52         | 9.000,00            | 20,10          | 58,42        | 0,46           | 5,50          |
| 2013   | release farm     | 9         | 9       | 12,10          | 1,10             | 3,10            | 7,90             | 0,09            | 0,25            | 1,97         | 0,74          | 1,29          | 1,45           | 0,06          | 0,08          | 12,50            | 1,00              | 3,50              | 7,50               | 0,10              | 0,25              | 0,52         | 9.000,00            | 18,89          | 58,75        | 0,07           | 1,00          |
| 2013   | release farm     | 10        | 10      | 9,20           | 1,40             | 1,90            | 5,90             | 0,11            | 0,22            | 3,71         | 2,01          | 0,99          | 1,79           | 0,14          | 0,13          | 8,50             | 0,50              | 1,50              | 6,50               | 0,05              | 0,18              | 0,46         | 9.000,00            | 19,43          | 55,67        | 0,08           | 1,00          |
| 2013   | release farm     | 11        | 11      | 8,30           | 0,60             | 2,00            | 5,70             | 0,07            | 0,22            | 2,00         | 0,70          | 1,49          | 0,95           | 0,08          | 0,15          | 8,50             | 0,50              | 2,00              | 6,00               | 0,06              | 0,21              | 0,42         | 8.610,00            | 17,75          | 63,58        | 0,06           | 0,70          |
| 2013   | release farm     | 12        | 12      | 5,40           | 0,60             | 0,90            | 3,90             | 0,08            | 0,16            | 2,67         | 0,70          | 0,57          | 1,91           | 0,09          | 0,11          | 6,00             | 0,50              | 1,00              | 4,00               | 0,07              | 0,15              | 0,29         | 8.700,00            | 15,40          | 56,79        | 0,08           | 1,00          |
| 2013   | release farm     | 13        | 13      | 3,60           | 0,30             | 0,80            | 2,50             | 0,05            | 0,20            | 2,50         | 0,48          | 0,63          | 1,72           | 0,08          | 0,16          | 4,00             | 0,00              | 1,00              | 3,00               | 0,00              | 0,23              | 0,19         | 8.550,00            | 12,76          | 60,64        | 0,07           | 1,00          |
| 2014   | non release farm | 1         | 14      | 26,30          | 14,80            | 0,00            | 11,50            | 0,55            | 0,00            | 5,06         | 4,69          | 0,00          | 2,27           | 0,09          | 0,00          | 25,00            | 13,50             | 0,00              | 10,50              | 0,57              | 0,00              | 1,38         | 0,00                | 29,58          | 50,96        | 2,00           | 24,00         |
| 2014   | non release farm | 2         | 15      | 24,20          | 14,90            | 0,00            | 9,30             | 0,62            | 0,00            | 9,48         | 5,57          | 0,00          | 4,11           | 0,05          | 0,00          | 22,00            | 13,50             | 0,00              | 8,50               | 0,61              | 0,00              | 1,26         | 0,00                | 27,75          | 47,25        | 0,63           | 8,00          |
| 2014   | non release farm | 3         | 16      | 25,00          | 15,10            | 0,00            | 9,90             | 0,60            | 0,00            | 7,27         | 5,22          | 0,00          | 2,69           | 0,06          | 0,00          | 24,00            | 14,50             | 0,00              | 9,00               | 0,61              | 0,00              | 1,23         | 0,00                | 29,18          | 47,92        | 3,81           | 43,00         |
| 2014   | non release farm | 4         | 17      | 27,10          | 15,60            | 0,00            | 11,50            | 0,57            | 0,00            | 6,98         | 4,95          | 0,00          | 3,34           | 0,08          | 0,00          | 26,00            | 15,50             | 0,00              | 11,50              | 0,59              | 0,00              | 1,10         | 0,00                | 26,71          | 47,54        | 0,51           | 5,90          |
| 2014   | non release farm | 5         | 18      | 21,00          | 11,50            | 0,00            | 9,20             | 0,54            | 0,00            | 6,34         | 3,89          | 0,00          | 2,35           | 0,05          | 0,00          | 21,00            | 12,00             | 0,00              | 9,00               | 0,57              | 0,00              | 1,31         | 0,00                | 26,63          | 51,71        | 2,13           | 25,60         |
| 2014   | non release farm | 6         | 19      | 23,60          | 14,90            | 0,00            | 8,70             | 0,62            | 0,00            | 6,36         | 5,15          | 0,00          | 2,54           | 0,11          | 0,00          | 24,00            | 15,00             | 0,00              | 8,50               | 0,64              | 0,00              | 1,04         | 0,00                | 29,11          | 55,19        | 1,92           | 25,00         |
| 2014   | non release farm | 7         | 20      | 20,40          | 11,30            | 0,00            | 9,10             | 0,57            | 0,00            | 4,35         | 2,11          | 0,00          | 4,01           | 0,11          | 0,00          | 20,50            | 10,50             | 0,00              | 8,50               | 0,56              | 0,00              | 1,15         | 0,00                | 23,08          | 53,42        | 0,21           | 3,00          |
| 2014   | non release farm | 8         | 21      | 22,60          | 15,20            | 0,00            | 7,20             | 0,66            | 0,00            | 5,62         | 5,07          | 0,00          | 1,62           | 0,09          | 0,00          | 21,50            | 15,00             | 0,00              | 7,00               | 0,66              | 0,00              | 1,27         | 0,00                | 22,00          | 56,20        | 0,12           | 2,00          |
| 2014   | non release farm | 9         | 22      | 24,00          | 15,10            | 0,00            | 8,90             | 0,63            | 0,00            | 8,89         | 5,43          | 0,00          | 3,87           | 0,06          | 0,00          | 21,50            | 13,50             | 0,00              | 8,50               | 0,64              | 0,00              | 1,10         | 0,00                | 20,00          | 64,35        | 0,38           | 4,00          |
| 2014   | non release farm | 10        | 23      | 21,40          | 11,70            | 0,00            | 9,70             | 0,56            | 0,00            | 6,20         | 4,52          | 0,00          | 5,25           | 0,16          | 0,00          | 20,50            | 11,50             | 0,00              | 7,50               | 0,60              | 0,00              | 1,08         | 0,00                | 18,00          | 68,00        | 0,23           | 3,00          |
| 2014   | non release farm | 11        | 24      | 16,90          | 9,00             | 0,00            | 7,90             | 0,53            | 0,00            | 3,87         | 4,16          | 0,00          | 3,96           | 0,20          | 0,00          | 16,50            | 9,00              | 0,00              | 7,00               | 0,67              | 0,00              | 1,00         | 0,00                | 17,00          | 63,00        | 0,25           | 3,00          |
| 2014   | non release farm | 12        | 25      | 16,30          | 8,60             | 0,00            | 7,70             | 0,50            | 0,00            | 5,38         | 4,43          | 0,00          | 2,36           | 0,18          | 0,00          | 15,00            | 9,00              | 0,00              | 7,00               | 0,57              | 0,00              | 0,85         | 0,00                | 16,00          | 67,00        | 0,08           | 1,50          |

xmedfly

|      |                  |    |    |       |      |      |      |      |      |      |      |      |      |      |      |       |      |      |      |      |      |      |          |       |       |      |       |
|------|------------------|----|----|-------|------|------|------|------|------|------|------|------|------|------|------|-------|------|------|------|------|------|------|----------|-------|-------|------|-------|
| 2014 | non release farm | 13 | 26 | 15,50 | 7,50 | 0,00 | 8,00 | 0,48 | 0,00 | 2,99 | 3,17 | 0,00 | 3,02 | 0,18 | 0,00 | 15,00 | 6,50 | 0,00 | 8,50 | 0,42 | 0,00 | 0,60 | 0,00     | 10,00 | 58,00 | 0,14 | 1,50  |
| 2014 | release farm     | 1  | 14 | 18,70 | 7,40 | 3,50 | 7,80 | 0,40 | 0,18 | 6,00 | 2,63 | 2,01 | 2,74 | 0,09 | 0,06 | 17,50 | 6,50 | 3,00 | 7,50 | 0,41 | 0,17 | 0,90 | 8.580,00 | 29,58 | 50,95 | 2,00 | 24,10 |
| 2014 | release farm     | 2  | 15 | 21,10 | 7,50 | 5,20 | 8,40 | 0,35 | 0,25 | 3,57 | 2,84 | 2,49 | 2,76 | 0,10 | 0,13 | 22,50 | 6,50 | 4,50 | 7,50 | 0,32 | 0,22 | 1,07 | 8.550,00 | 28,79 | 47,13 | 0,60 | 7,60  |
| 2014 | release farm     | 3  | 16 | 20,20 | 6,20 | 5,30 | 8,70 | 0,30 | 0,26 | 3,36 | 2,44 | 1,95 | 1,34 | 0,10 | 0,06 | 20,00 | 6,50 | 5,00 | 8,50 | 0,32 | 0,26 | 0,78 | 9.000,00 | 29,19 | 47,92 | 3,81 | 41,90 |
| 2014 | release farm     | 4  | 17 | 14,60 | 4,40 | 4,40 | 5,80 | 0,30 | 0,29 | 3,60 | 1,43 | 2,17 | 1,23 | 0,07 | 0,08 | 14,00 | 4,50 | 3,50 | 6,00 | 0,31 | 0,29 | 0,73 | 8.700,00 | 26,70 | 47,54 | 0,51 | 6,10  |
| 2014 | release farm     | 5  | 18 | 13,90 | 4,40 | 3,80 | 5,70 | 0,31 | 0,28 | 4,04 | 2,07 | 1,48 | 1,64 | 0,09 | 0,07 | 13,50 | 4,50 | 4,00 | 6,00 | 0,31 | 0,28 | 0,63 | 9.000,00 | 26,63 | 51,71 | 2,10 | 25,60 |
| 2014 | release farm     | 6  | 19 | 14,10 | 4,10 | 3,70 | 6,30 | 0,28 | 0,26 | 3,73 | 1,79 | 1,49 | 1,42 | 0,08 | 0,07 | 14,00 | 4,00 | 3,50 | 6,00 | 0,28 | 0,29 | 0,50 | 8.940,00 | 29,11 | 55,19 | 1,92 | 25,00 |
| 2014 | release farm     | 7  | 20 | 11,60 | 2,20 | 3,50 | 5,90 | 0,19 | 0,31 | 2,17 | 0,92 | 0,97 | 1,73 | 0,07 | 0,08 | 11,00 | 2,00 | 3,00 | 6,00 | 0,17 | 0,30 | 0,58 | 9.150,00 | 23,08 | 53,42 | 0,21 | 2,50  |
| 2014 | release farm     | 8  | 21 | 13,00 | 2,90 | 4,10 | 6,30 | 0,21 | 0,33 | 3,56 | 2,02 | 1,45 | 2,21 | 0,11 | 0,13 | 12,50 | 2,00 | 4,00 | 5,50 | 0,19 | 0,34 | 0,54 | 9.000,00 | 22,31 | 56,92 | 0,13 | 1,50  |
| 2014 | release farm     | 9  | 22 | 11,40 | 2,10 | 4,00 | 5,30 | 0,17 | 0,35 | 2,76 | 1,45 | 1,15 | 1,25 | 0,08 | 0,08 | 10,50 | 1,50 | 3,50 | 5,50 | 0,15 | 0,33 | 0,40 | 8.970,00 | 19,77 | 63,82 | 0,39 | 5,40  |
| 2014 | release farm     | 10 | 23 | 10,50 | 0,70 | 3,20 | 6,60 | 0,06 | 0,31 | 1,72 | 1,06 | 1,03 | 1,35 | 0,09 | 0,10 | 10,50 | 0,00 | 3,00 | 6,50 | 0,00 | 0,31 | 0,35 | 9.000,00 | 17,42 | 66,17 | 0,23 | 2,80  |
| 2014 | release farm     | 11 | 24 | 6,90  | 0,40 | 2,00 | 4,50 | 0,05 | 0,26 | 3,18 | 0,52 | 1,25 | 2,12 | 0,07 | 0,14 | 7,00  | 0,00 | 2,00 | 5,00 | 0,00 | 0,29 | 0,50 | 9.000,00 | 16,33 | 60,83 | 0,26 | 3,10  |
| 2014 | release farm     | 12 | 25 | 6,00  | 0,20 | 1,80 | 4,00 | 0,03 | 0,24 | 3,40 | 0,42 | 1,23 | 2,31 | 0,06 | 0,14 | 7,00  | 0,00 | 2,00 | 5,00 | 0,00 | 0,25 | 0,21 | 8.400,00 | 15,49 | 68,17 | 0,08 | 1,00  |
| 2014 | release farm     | 13 | 26 | 4,60  | 0,10 | 1,30 | 3,20 | 0,01 | 0,20 | 3,63 | 0,32 | 1,06 | 2,53 | 0,04 | 0,14 | 5,00  | 0,00 | 1,50 | 3,50 | 0,00 | 0,25 | 0,08 | 8.460,00 | 11,20 | 60,11 | 0,14 | 2,00  |
